# Supplementary material
Source: PubMed Central journal article supplement (PMC3589086)
Supplement: embor20131s1.pdf [file embor20131s1.pdf]

**Supplemental Table 1: Peak locations for Brk ChIP**

| <b>Chromosome</b> | <b>Start</b> | <b>End</b> |
|-------------------|--------------|------------|
| chr2L             | 73202        | 74258      |
| chr2L             | 79302        | 79671      |
| chr2L             | 88570        | 89091      |
| chr2L             | 160527       | 160949     |
| chr2L             | 161115       | 162405     |
| chr2L             | 165969       | 166975     |
| chr2L             | 168177       | 168698     |
| chr2L             | 221078       | 221927     |
| chr2L             | 222000       | 222608     |
| chr2L             | 223070       | 223491     |
| chr2L             | 224117       | 225443     |
| chr2L             | 245133       | 245953     |
| chr2L             | 246759       | 247581     |
| chr2L             | 248129       | 248674     |
| chr2L             | 249482       | 250552     |
| chr2L             | 252085       | 252654     |
| chr2L             | 297749       | 298262     |
| chr2L             | 357539       | 358545     |
| chr2L             | 367838       | 368650     |
| chr2L             | 368740       | 369704     |
| chr2L             | 370314       | 370814     |
| chr2L             | 375575       | 375905     |
| chr2L             | 376192       | 378992     |
| chr2L             | 379324       | 379989     |
| chr2L             | 380732       | 381511     |
| chr2L             | 403758       | 404300     |
| chr2L             | 414700       | 415146     |
| chr2L             | 419676       | 420442     |
| chr2L             | 422721       | 423233     |
| chr2L             | 427397       | 428085     |
| chr2L             | 429675       | 430715     |
| chr2L             | 438915       | 440011     |
| chr2L             | 440323       | 440770     |
| chr2L             | 441931       | 442579     |
| chr2L             | 478776       | 481504     |
| chr2L             | 499610       | 500557     |
| chr2L             | 504759       | 505498     |
| chr2L             | 506508       | 507737     |
| chr2L             | 509002       | 509910     |
| chr2L             | 510054       | 511003     |
| chr2L             | 529901       | 531059     |
| chr2L             | 534416       | 535043     |
| chr2L             | 547221       | 548854     |
| chr2L             | 593675       | 595905     |
| chr2L             | 633601       | 633967     |
| chr2L             | 669012       | 669805     |
| chr2L             | 670356       | 671482     |
| chr2L             | 715323       | 716131     |
| chr2L             | 867002       | 867446     |
| chr2L             | 867747       | 868422     |

|       |         |         |
|-------|---------|---------|
| chr2L | 870733  | 871345  |
| chr2L | 1062483 | 1064478 |
| chr2L | 1064795 | 1065499 |
| chr2L | 1065845 | 1066780 |
| chr2L | 1117162 | 1118020 |
| chr2L | 1118717 | 1119787 |
| chr2L | 1142635 | 1143609 |
| chr2L | 1157400 | 1158474 |
| chr2L | 1172284 | 1173013 |
| chr2L | 1185857 | 1186648 |
| chr2L | 1419568 | 1420637 |
| chr2L | 1427060 | 1427419 |
| chr2L | 1462502 | 1463198 |
| chr2L | 1463272 | 1464062 |
| chr2L | 1470582 | 1471459 |
| chr2L | 1485549 | 1486337 |
| chr2L | 1642797 | 1644237 |
| chr2L | 1644371 | 1645080 |
| chr2L | 1645227 | 1645934 |
| chr2L | 1646992 | 1647707 |
| chr2L | 1647800 | 1649395 |
| chr2L | 1651121 | 1651796 |
| chr2L | 1667531 | 1668252 |
| chr2L | 1668341 | 1668922 |
| chr2L | 1669134 | 1670936 |
| chr2L | 1671151 | 1672178 |
| chr2L | 1723136 | 1723836 |
| chr2L | 1884619 | 1885050 |
| chr2L | 1970668 | 1971133 |
| chr2L | 1971900 | 1973733 |
| chr2L | 1987061 | 1987828 |
| chr2L | 2161698 | 2162515 |
| chr2L | 2162867 | 2165560 |
| chr2L | 2167004 | 2167495 |
| chr2L | 2174955 | 2175586 |
| chr2L | 2177537 | 2178451 |
| chr2L | 2196134 | 2197348 |
| chr2L | 2197645 | 2198290 |
| chr2L | 2202058 | 2202606 |
| chr2L | 2220650 | 2221184 |
| chr2L | 2221489 | 2221996 |
| chr2L | 2429410 | 2429980 |
| chr2L | 2438722 | 2439659 |
| chr2L | 2448035 | 2448541 |
| chr2L | 2448846 | 2450391 |
| chr2L | 2451069 | 2451734 |
| chr2L | 2451849 | 2452647 |
| chr2L | 2454282 | 2455933 |
| chr2L | 2466633 | 2467433 |
| chr2L | 2486859 | 2487991 |
| chr2L | 2751878 | 2752408 |
| chr2L | 2752655 | 2753326 |
| chr2L | 2754937 | 2755453 |

|       |         |         |
|-------|---------|---------|
| chr2L | 2830691 | 2831325 |
| chr2L | 2873442 | 2874438 |
| chr2L | 2976860 | 2977530 |
| chr2L | 3055418 | 3056043 |
| chr2L | 3056261 | 3057003 |
| chr2L | 3107038 | 3107998 |
| chr2L | 3345034 | 3346777 |
| chr2L | 3532784 | 3533833 |
| chr2L | 3533906 | 3535041 |
| chr2L | 3535685 | 3536323 |
| chr2L | 3536885 | 3537404 |
| chr2L | 3537962 | 3540489 |
| chr2L | 3540672 | 3541147 |
| chr2L | 3542628 | 3543816 |
| chr2L | 3558292 | 3558850 |
| chr2L | 3558936 | 3559506 |
| chr2L | 3559954 | 3560972 |
| chr2L | 3562429 | 3563326 |
| chr2L | 3576912 | 3577735 |
| chr2L | 3579289 | 3581156 |
| chr2L | 3596113 | 3596624 |
| chr2L | 3597534 | 3598051 |
| chr2L | 3605697 | 3607527 |
| chr2L | 3608292 | 3608952 |
| chr2L | 3632523 | 3632972 |
| chr2L | 3662519 | 3662972 |
| chr2L | 3712855 | 3714065 |
| chr2L | 3771219 | 3772278 |
| chr2L | 3772615 | 3773136 |
| chr2L | 3780436 | 3781083 |
| chr2L | 3803136 | 3804117 |
| chr2L | 3824785 | 3825558 |
| chr2L | 3835153 | 3837119 |
| chr2L | 3861122 | 3861484 |
| chr2L | 3888378 | 3889072 |
| chr2L | 4029679 | 4030693 |
| chr2L | 4031379 | 4032000 |
| chr2L | 4053651 | 4054388 |
| chr2L | 4211233 | 4211750 |
| chr2L | 4220798 | 4221293 |
| chr2L | 4255212 | 4256047 |
| chr2L | 4282592 | 4283059 |
| chr2L | 4286236 | 4287211 |
| chr2L | 4361272 | 4361733 |
| chr2L | 4381924 | 4382334 |
| chr2L | 4458552 | 4459135 |
| chr2L | 4459469 | 4460277 |
| chr2L | 4574610 | 4575565 |
| chr2L | 4591725 | 4592343 |
| chr2L | 4635680 | 4636759 |
| chr2L | 4886453 | 4887052 |
| chr2L | 4892016 | 4892699 |
| chr2L | 4981319 | 4982054 |

|       |         |         |
|-------|---------|---------|
| chr2L | 5000796 | 5001415 |
| chr2L | 5003731 | 5004375 |
| chr2L | 5070718 | 5071247 |
| chr2L | 5113371 | 5113981 |
| chr2L | 5208458 | 5209153 |
| chr2L | 5236767 | 5237590 |
| chr2L | 5248372 | 5249047 |
| chr2L | 5249430 | 5250647 |
| chr2L | 5252522 | 5253117 |
| chr2L | 5253164 | 5254915 |
| chr2L | 5255857 | 5256552 |
| chr2L | 5292192 | 5293338 |
| chr2L | 5296303 | 5297025 |
| chr2L | 5297270 | 5298413 |
| chr2L | 5305901 | 5306913 |
| chr2L | 5375289 | 5377685 |
| chr2L | 5402414 | 5402920 |
| chr2L | 5403516 | 5404411 |
| chr2L | 5421283 | 5422724 |
| chr2L | 5457773 | 5458520 |
| chr2L | 5459177 | 5459745 |
| chr2L | 5460660 | 5462149 |
| chr2L | 5462359 | 5462917 |
| chr2L | 5472425 | 5472839 |
| chr2L | 5567700 | 5568295 |
| chr2L | 5980381 | 5981099 |
| chr2L | 6020003 | 6020486 |
| chr2L | 6082080 | 6083570 |
| chr2L | 6086605 | 6088874 |
| chr2L | 6165640 | 6166229 |
| chr2L | 6178191 | 6178791 |
| chr2L | 6323536 | 6324067 |
| chr2L | 6338849 | 6339721 |
| chr2L | 6455126 | 6456859 |
| chr2L | 6479647 | 6480491 |
| chr2L | 6480934 | 6481630 |
| chr2L | 6528256 | 6529132 |
| chr2L | 6534800 | 6537289 |
| chr2L | 6648877 | 6649748 |
| chr2L | 6788259 | 6788980 |
| chr2L | 6793739 | 6794126 |
| chr2L | 6821054 | 6822184 |
| chr2L | 6833476 | 6834551 |
| chr2L | 7005596 | 7006412 |
| chr2L | 7010011 | 7010854 |
| chr2L | 7188062 | 7188861 |
| chr2L | 7194358 | 7194746 |
| chr2L | 7203820 | 7204287 |
| chr2L | 7302926 | 7303458 |
| chr2L | 7305984 | 7306368 |
| chr2L | 7306581 | 7308232 |
| chr2L | 7318275 | 7319310 |
| chr2L | 7320134 | 7321571 |

|       |         |         |
|-------|---------|---------|
| chr2L | 7358095 | 7360149 |
| chr2L | 7361479 | 7362416 |
| chr2L | 7372607 | 7373275 |
| chr2L | 7418083 | 7418852 |
| chr2L | 7419649 | 7420332 |
| chr2L | 7423270 | 7424755 |
| chr2L | 7424916 | 7425985 |
| chr2L | 7426578 | 7427066 |
| chr2L | 7438784 | 7439473 |
| chr2L | 7573458 | 7574156 |
| chr2L | 7576076 | 7577291 |
| chr2L | 7702682 | 7703228 |
| chr2L | 7703887 | 7704814 |
| chr2L | 7782816 | 7783500 |
| chr2L | 7799711 | 7800416 |
| chr2L | 7827888 | 7828924 |
| chr2L | 7903006 | 7903764 |
| chr2L | 7908583 | 7909562 |
| chr2L | 7909756 | 7910198 |
| chr2L | 7976255 | 7976760 |
| chr2L | 7984744 | 7985662 |
| chr2L | 8029647 | 8030453 |
| chr2L | 8083457 | 8084168 |
| chr2L | 8145004 | 8145648 |
| chr2L | 8146522 | 8147175 |
| chr2L | 8161952 | 8163423 |
| chr2L | 8204704 | 8205193 |
| chr2L | 8279403 | 8280258 |
| chr2L | 8298630 | 8299202 |
| chr2L | 8299352 | 8299738 |
| chr2L | 8300293 | 8301082 |
| chr2L | 8364566 | 8365190 |
| chr2L | 8471029 | 8472134 |
| chr2L | 8478218 | 8479085 |
| chr2L | 8529033 | 8529614 |
| chr2L | 8530665 | 8531158 |
| chr2L | 8534562 | 8535249 |
| chr2L | 8535671 | 8536592 |
| chr2L | 8554008 | 8554581 |
| chr2L | 8709081 | 8709814 |
| chr2L | 8817350 | 8818254 |
| chr2L | 8821650 | 8822702 |
| chr2L | 8825234 | 8826100 |
| chr2L | 8898660 | 8899051 |
| chr2L | 8960410 | 8961127 |
| chr2L | 8989353 | 8989922 |
| chr2L | 8997279 | 8997902 |
| chr2L | 9125764 | 9126118 |
| chr2L | 9493107 | 9494862 |
| chr2L | 9496012 | 9496930 |
| chr2L | 9568315 | 9569435 |
| chr2L | 9580509 | 9582627 |
| chr2L | 9607883 | 9608932 |

|       |          |          |
|-------|----------|----------|
| chr2L | 9613379  | 9614144  |
| chr2L | 9698250  | 9699280  |
| chr2L | 9705030  | 9705937  |
| chr2L | 9757872  | 9759144  |
| chr2L | 9783488  | 9784367  |
| chr2L | 9790497  | 9791153  |
| chr2L | 9982679  | 9983499  |
| chr2L | 9989718  | 9990145  |
| chr2L | 10032981 | 10033744 |
| chr2L | 10226049 | 10226703 |
| chr2L | 10230381 | 10231206 |
| chr2L | 10457278 | 10457938 |
| chr2L | 10506510 | 10507459 |
| chr2L | 10614573 | 10615231 |
| chr2L | 10676792 | 10677550 |
| chr2L | 10934724 | 10935406 |
| chr2L | 10967083 | 10967782 |
| chr2L | 11020855 | 11021522 |
| chr2L | 11023470 | 11024308 |
| chr2L | 11049571 | 11050578 |
| chr2L | 11155191 | 11155924 |
| chr2L | 11176278 | 11176791 |
| chr2L | 11184385 | 11184972 |
| chr2L | 11232305 | 11232911 |
| chr2L | 11268851 | 11269338 |
| chr2L | 11291914 | 11292354 |
| chr2L | 11305856 | 11306535 |
| chr2L | 11327465 | 11328445 |
| chr2L | 11328566 | 11329218 |
| chr2L | 11358160 | 11359325 |
| chr2L | 11362583 | 11363485 |
| chr2L | 11363597 | 11364449 |
| chr2L | 11445106 | 11445605 |
| chr2L | 11445689 | 11446856 |
| chr2L | 11446897 | 11447740 |
| chr2L | 11454196 | 11454866 |
| chr2L | 11583503 | 11584308 |
| chr2L | 11806217 | 11807125 |
| chr2L | 11807378 | 11808142 |
| chr2L | 11967978 | 11969023 |
| chr2L | 12003045 | 12005083 |
| chr2L | 12005203 | 12005916 |
| chr2L | 12010268 | 12012772 |
| chr2L | 12013352 | 12014125 |
| chr2L | 12084691 | 12086333 |
| chr2L | 12112595 | 12113561 |
| chr2L | 12423760 | 12424306 |
| chr2L | 12507421 | 12508402 |
| chr2L | 12576308 | 12576893 |
| chr2L | 12586927 | 12587429 |
| chr2L | 12587475 | 12588010 |
| chr2L | 12588776 | 12589298 |
| chr2L | 12617567 | 12619179 |

|       |          |          |
|-------|----------|----------|
| chr2L | 12636615 | 12637512 |
| chr2L | 12646504 | 12646978 |
| chr2L | 12657411 | 12658417 |
| chr2L | 12840540 | 12841495 |
| chr2L | 13060102 | 13060697 |
| chr2L | 13086631 | 13087549 |
| chr2L | 13092436 | 13093673 |
| chr2L | 13095704 | 13096305 |
| chr2L | 13176726 | 13177694 |
| chr2L | 13191303 | 13192005 |
| chr2L | 13266558 | 13267425 |
| chr2L | 13373861 | 13374639 |
| chr2L | 13500639 | 13501159 |
| chr2L | 13548014 | 13548935 |
| chr2L | 13549074 | 13549638 |
| chr2L | 13569601 | 13570288 |
| chr2L | 13665486 | 13666416 |
| chr2L | 13834988 | 13836131 |
| chr2L | 13955225 | 13956284 |
| chr2L | 14348098 | 14349007 |
| chr2L | 14365687 | 14366754 |
| chr2L | 14369301 | 14370324 |
| chr2L | 14381576 | 14382344 |
| chr2L | 14386049 | 14386977 |
| chr2L | 14410130 | 14411265 |
| chr2L | 14426391 | 14427299 |
| chr2L | 14460769 | 14461511 |
| chr2L | 14490681 | 14491414 |
| chr2L | 14499028 | 14499858 |
| chr2L | 14512623 | 14513483 |
| chr2L | 14550901 | 14551354 |
| chr2L | 14552174 | 14553012 |
| chr2L | 14557252 | 14558312 |
| chr2L | 14560163 | 14561224 |
| chr2L | 15060727 | 15061283 |
| chr2L | 15107174 | 15107673 |
| chr2L | 15108019 | 15109262 |
| chr2L | 15109319 | 15110530 |
| chr2L | 15111106 | 15111975 |
| chr2L | 15112175 | 15112992 |
| chr2L | 15271190 | 15271977 |
| chr2L | 15304658 | 15305434 |
| chr2L | 15329578 | 15329987 |
| chr2L | 15333185 | 15334112 |
| chr2L | 15386049 | 15386843 |
| chr2L | 15386996 | 15388143 |
| chr2L | 15413764 | 15414296 |
| chr2L | 15425466 | 15426178 |
| chr2L | 15463806 | 15464544 |
| chr2L | 15465504 | 15466245 |
| chr2L | 15742733 | 15744986 |
| chr2L | 15745833 | 15746775 |
| chr2L | 15747306 | 15748414 |

|       |          |          |
|-------|----------|----------|
| chr2L | 15911302 | 15911819 |
| chr2L | 16257034 | 16257558 |
| chr2L | 16261437 | 16261869 |
| chr2L | 16287350 | 16287720 |
| chr2L | 16325155 | 16326157 |
| chr2L | 16405664 | 16406333 |
| chr2L | 16422283 | 16423453 |
| chr2L | 16476271 | 16477108 |
| chr2L | 16485434 | 16487359 |
| chr2L | 16491048 | 16492121 |
| chr2L | 16525873 | 16526410 |
| chr2L | 16597998 | 16598912 |
| chr2L | 16620921 | 16621545 |
| chr2L | 16683771 | 16684486 |
| chr2L | 16685334 | 16685931 |
| chr2L | 16689906 | 16690822 |
| chr2L | 16716219 | 16716936 |
| chr2L | 16720053 | 16720864 |
| chr2L | 16840249 | 16840784 |
| chr2L | 16880402 | 16881942 |
| chr2L | 17184688 | 17185212 |
| chr2L | 17383609 | 17384739 |
| chr2L | 17749465 | 17750181 |
| chr2L | 17768487 | 17769323 |
| chr2L | 17774578 | 17775185 |
| chr2L | 17784665 | 17785394 |
| chr2L | 18312304 | 18313116 |
| chr2L | 18455577 | 18456156 |
| chr2L | 18463579 | 18464000 |
| chr2L | 18468239 | 18468925 |
| chr2L | 18479202 | 18479750 |
| chr2L | 18485141 | 18485569 |
| chr2L | 18516697 | 18517412 |
| chr2L | 18570579 | 18571238 |
| chr2L | 18590289 | 18591030 |
| chr2L | 18617245 | 18617901 |
| chr2L | 18626985 | 18627698 |
| chr2L | 18664781 | 18665837 |
| chr2L | 18677293 | 18678031 |
| chr2L | 18695104 | 18695974 |
| chr2L | 18726996 | 18727694 |
| chr2L | 18735402 | 18735937 |
| chr2L | 18782485 | 18783483 |
| chr2L | 18795926 | 18797060 |
| chr2L | 18799326 | 18800231 |
| chr2L | 18804091 | 18804657 |
| chr2L | 18866015 | 18866521 |
| chr2L | 18867508 | 18869699 |
| chr2L | 18871157 | 18871894 |
| chr2L | 18872060 | 18872576 |
| chr2L | 18874217 | 18875308 |
| chr2L | 18875975 | 18876750 |
| chr2L | 18880487 | 18882426 |



|       |          |          |
|-------|----------|----------|
| chr2L | 18882659 | 18883361 |
| chr2L | 18889162 | 18889942 |
| chr2L | 18903139 | 18903796 |
| chr2L | 18935633 | 18936002 |
| chr2L | 18944028 | 18944942 |
| chr2L | 18945590 | 18946904 |
| chr2L | 18947273 | 18948185 |
| chr2L | 19053799 | 19054780 |
| chr2L | 19136040 | 19136987 |
| chr2L | 19137202 | 19138209 |
| chr2L | 19160949 | 19162140 |
| chr2L | 19225594 | 19226982 |
| chr2L | 19321864 | 19322798 |
| chr2L | 19323415 | 19324149 |
| chr2L | 19362504 | 19363250 |
| chr2L | 19397286 | 19398019 |
| chr2L | 19438879 | 19439339 |
| chr2L | 19444732 | 19445174 |
| chr2L | 19454119 | 19454782 |
| chr2L | 19548222 | 19548854 |
| chr2L | 19571197 | 19571751 |
| chr2L | 19572040 | 19572652 |
| chr2L | 19575096 | 19576947 |
| chr2L | 19644412 | 19645144 |
| chr2L | 19758211 | 19758973 |
| chr2L | 19763741 | 19764315 |
| chr2L | 19865647 | 19866475 |
| chr2L | 19904150 | 19904736 |
| chr2L | 20074518 | 20075249 |
| chr2L | 20085078 | 20085698 |
| chr2L | 20175032 | 20175646 |
| chr2L | 20350187 | 20351145 |
| chr2L | 20645584 | 20646309 |
| chr2L | 20666078 | 20667150 |
| chr2L | 20716038 | 20716484 |
| chr2L | 20769709 | 20771340 |
| chr2L | 20777104 | 20777757 |
| chr2L | 20782230 | 20783310 |
| chr2L | 20793344 | 20794268 |
| chr2L | 20797375 | 20798517 |
| chr2L | 20799896 | 20800634 |
| chr2L | 20802062 | 20803316 |
| chr2L | 20822760 | 20823356 |
| chr2L | 20824360 | 20825442 |
| chr2L | 20864745 | 20865622 |
| chr2L | 20970718 | 20971249 |
| chr2L | 21008691 | 21009750 |
| chr2L | 21009842 | 21010819 |
| chr2L | 21017744 | 21018739 |
| chr2L | 21019249 | 21020077 |
| chr2L | 21023960 | 21024684 |
| chr2L | 21168335 | 21168893 |
| chr2L | 21237095 | 21238146 |

|       |          |          |
|-------|----------|----------|
| chr2L | 21244998 | 21245469 |
| chr2L | 21628550 | 21629889 |
| chr2L | 21681394 | 21682145 |
| chr2L | 21808444 | 21808926 |
| chr2L | 21827731 | 21829273 |
| chr2L | 21846323 | 21847681 |
| chr2L | 21866144 | 21866817 |
| chr2L | 21867038 | 21867832 |
| chr2L | 22018486 | 22019606 |
| chr2L | 22024229 | 22025305 |
| chr2L | 22133909 | 22134646 |
| chr2L | 22239766 | 22240455 |
| chr2L | 22429007 | 22429681 |
| chr2L | 22957808 | 22958851 |
| chr2R | 122054   | 123058   |
| chr2R | 402862   | 403402   |
| chr2R | 559684   | 560289   |
| chr2R | 975818   | 976573   |
| chr2R | 1382615  | 1383487  |
| chr2R | 1541274  | 1541882  |
| chr2R | 1575296  | 1576200  |
| chr2R | 1612934  | 1615500  |
| chr2R | 1624115  | 1625441  |
| chr2R | 1635658  | 1636987  |
| chr2R | 1637990  | 1639128  |
| chr2R | 1639536  | 1640008  |
| chr2R | 1669998  | 1670641  |
| chr2R | 1788237  | 1789139  |
| chr2R | 1879868  | 1881959  |
| chr2R | 1997231  | 1998278  |
| chr2R | 2007758  | 2008502  |
| chr2R | 2019098  | 2019784  |
| chr2R | 2027966  | 2028427  |
| chr2R | 2034544  | 2035220  |
| chr2R | 2035556  | 2036155  |
| chr2R | 2055800  | 2056389  |
| chr2R | 2077445  | 2078072  |
| chr2R | 2108398  | 2109822  |
| chr2R | 2123322  | 2123988  |
| chr2R | 2128835  | 2130109  |
| chr2R | 2388904  | 2389983  |
| chr2R | 2407466  | 2408627  |
| chr2R | 2417051  | 2417813  |
| chr2R | 2418590  | 2419320  |
| chr2R | 2419944  | 2420678  |
| chr2R | 2515560  | 2516304  |
| chr2R | 2518679  | 2520838  |
| chr2R | 2535299  | 2535910  |
| chr2R | 2549401  | 2550234  |
| chr2R | 2550348  | 2551113  |
| chr2R | 2646347  | 2646968  |
| chr2R | 2647913  | 2648404  |
| chr2R | 2872784  | 2873643  |

|       |         |         |
|-------|---------|---------|
| chr2R | 2899665 | 2900330 |
| chr2R | 2900427 | 2900999 |
| chr2R | 2974864 | 2975626 |
| chr2R | 3032230 | 3032801 |
| chr2R | 3033019 | 3034448 |
| chr2R | 3132449 | 3134969 |
| chr2R | 3135106 | 3135823 |
| chr2R | 3135871 | 3137097 |
| chr2R | 3169914 | 3170364 |
| chr2R | 3170630 | 3171498 |
| chr2R | 3176331 | 3177429 |
| chr2R | 3258136 | 3258820 |
| chr2R | 3301104 | 3301959 |
| chr2R | 3304535 | 3305325 |
| chr2R | 3305520 | 3306167 |
| chr2R | 3306548 | 3307516 |
| chr2R | 3343987 | 3344898 |
| chr2R | 3375283 | 3376134 |
| chr2R | 3416646 | 3417194 |
| chr2R | 3470802 | 3471357 |
| chr2R | 3474079 | 3475002 |
| chr2R | 3475173 | 3476477 |
| chr2R | 3520931 | 3521710 |
| chr2R | 3876386 | 3877257 |
| chr2R | 3905710 | 3906883 |
| chr2R | 3912775 | 3913605 |
| chr2R | 3916670 | 3919442 |
| chr2R | 3923262 | 3924153 |
| chr2R | 3924319 | 3925005 |
| chr2R | 3955176 | 3956980 |
| chr2R | 4009893 | 4010850 |
| chr2R | 4032208 | 4032958 |
| chr2R | 4043621 | 4044441 |
| chr2R | 4061747 | 4062702 |
| chr2R | 4082586 | 4082990 |
| chr2R | 4118044 | 4119213 |
| chr2R | 4119506 | 4119986 |
| chr2R | 4124067 | 4124995 |
| chr2R | 4214484 | 4215443 |
| chr2R | 4501921 | 4502488 |
| chr2R | 4519595 | 4520683 |
| chr2R | 4524699 | 4525684 |
| chr2R | 4526081 | 4527265 |
| chr2R | 4527620 | 4528572 |
| chr2R | 4534871 | 4535582 |
| chr2R | 4538425 | 4539096 |
| chr2R | 4623004 | 4624097 |
| chr2R | 4624302 | 4625242 |
| chr2R | 4625425 | 4626346 |
| chr2R | 4915684 | 4916976 |
| chr2R | 4931956 | 4933194 |
| chr2R | 5009404 | 5010063 |
| chr2R | 5025097 | 5025779 |

|       |         |         |
|-------|---------|---------|
| chr2R | 5076818 | 5078102 |
| chr2R | 5082044 | 5083295 |
| chr2R | 5171677 | 5172570 |
| chr2R | 5195834 | 5196534 |
| chr2R | 5287176 | 5287719 |
| chr2R | 5327613 | 5328387 |
| chr2R | 5329897 | 5330793 |
| chr2R | 5380335 | 5381269 |
| chr2R | 5433522 | 5434869 |
| chr2R | 5439106 | 5441404 |
| chr2R | 5465098 | 5465866 |
| chr2R | 5681976 | 5683248 |
| chr2R | 5729399 | 5730247 |
| chr2R | 5847160 | 5847656 |
| chr2R | 5875592 | 5876422 |
| chr2R | 5911202 | 5911818 |
| chr2R | 5942727 | 5943520 |
| chr2R | 5943726 | 5944326 |
| chr2R | 5945592 | 5946015 |
| chr2R | 5998078 | 5998968 |
| chr2R | 6011669 | 6012653 |
| chr2R | 6047060 | 6047754 |
| chr2R | 6125408 | 6126100 |
| chr2R | 6158178 | 6159189 |
| chr2R | 6317172 | 6317947 |
| chr2R | 6427812 | 6428716 |
| chr2R | 6429127 | 6429777 |
| chr2R | 6430087 | 6431190 |
| chr2R | 6467197 | 6467935 |
| chr2R | 6468545 | 6470258 |
| chr2R | 6470556 | 6471105 |
| chr2R | 6484424 | 6484963 |
| chr2R | 6562346 | 6562782 |
| chr2R | 6618785 | 6619526 |
| chr2R | 6660425 | 6661032 |
| chr2R | 6669588 | 6670437 |
| chr2R | 6761248 | 6761793 |
| chr2R | 6761920 | 6762625 |
| chr2R | 6987881 | 6988379 |
| chr2R | 6993780 | 6994355 |
| chr2R | 7071338 | 7071759 |
| chr2R | 7076066 | 7076504 |
| chr2R | 7084671 | 7085200 |
| chr2R | 7090165 | 7090864 |
| chr2R | 7146091 | 7146741 |
| chr2R | 7171446 | 7172220 |
| chr2R | 7245836 | 7246745 |
| chr2R | 7252250 | 7253359 |
| chr2R | 7254391 | 7255126 |
| chr2R | 7271444 | 7272356 |
| chr2R | 7325292 | 7325845 |
| chr2R | 7361936 | 7364554 |
| chr2R | 7368405 | 7369250 |

|       |         |         |
|-------|---------|---------|
| chr2R | 7372183 | 7373155 |
| chr2R | 7384747 | 7385221 |
| chr2R | 7390421 | 7391314 |
| chr2R | 7396246 | 7396766 |
| chr2R | 7414707 | 7417822 |
| chr2R | 7418806 | 7419515 |
| chr2R | 7425702 | 7426551 |
| chr2R | 7428331 | 7430608 |
| chr2R | 7436581 | 7438108 |
| chr2R | 7448360 | 7449413 |
| chr2R | 7462847 | 7463490 |
| chr2R | 7490329 | 7491083 |
| chr2R | 7492137 | 7492870 |
| chr2R | 7494496 | 7495073 |
| chr2R | 7525618 | 7526015 |
| chr2R | 7547945 | 7548548 |
| chr2R | 7650689 | 7651383 |
| chr2R | 7779466 | 7780427 |
| chr2R | 7800142 | 7800542 |
| chr2R | 7899929 | 7900518 |
| chr2R | 7915115 | 7915779 |
| chr2R | 8057245 | 8057800 |
| chr2R | 8061233 | 8062087 |
| chr2R | 8416258 | 8416911 |
| chr2R | 8476352 | 8477712 |
| chr2R | 8479897 | 8480483 |
| chr2R | 8519818 | 8520516 |
| chr2R | 8664088 | 8665232 |
| chr2R | 8667647 | 8668349 |
| chr2R | 8771014 | 8772695 |
| chr2R | 8773684 | 8774328 |
| chr2R | 8775951 | 8776733 |
| chr2R | 8787057 | 8787744 |
| chr2R | 8789551 | 8790239 |
| chr2R | 8791132 | 8793146 |
| chr2R | 8793215 | 8794062 |
| chr2R | 8796725 | 8797577 |
| chr2R | 8833507 | 8834423 |
| chr2R | 8843530 | 8844016 |
| chr2R | 8844217 | 8846793 |
| chr2R | 8847072 | 8848022 |
| chr2R | 8859258 | 8859973 |
| chr2R | 8866479 | 8867020 |
| chr2R | 8867097 | 8869234 |
| chr2R | 8870808 | 8871419 |
| chr2R | 8871844 | 8872693 |
| chr2R | 8872916 | 8873869 |
| chr2R | 8874270 | 8875267 |
| chr2R | 8876623 | 8877306 |
| chr2R | 8877900 | 8878631 |
| chr2R | 8879396 | 8880119 |
| chr2R | 8882826 | 8884887 |
| chr2R | 8892115 | 8892827 |

|       |          |          |
|-------|----------|----------|
| chr2R | 8898787  | 8899425  |
| chr2R | 8900056  | 8901346  |
| chr2R | 8902019  | 8902608  |
| chr2R | 8903000  | 8903951  |
| chr2R | 8904328  | 8905032  |
| chr2R | 8905342  | 8907101  |
| chr2R | 8907306  | 8909243  |
| chr2R | 8909747  | 8911337  |
| chr2R | 8912955  | 8913497  |
| chr2R | 8916240  | 8916940  |
| chr2R | 8918259  | 8918952  |
| chr2R | 8919674  | 8920970  |
| chr2R | 8921439  | 8921825  |
| chr2R | 8922301  | 8923782  |
| chr2R | 8924385  | 8925268  |
| chr2R | 8925586  | 8926330  |
| chr2R | 8926941  | 8928958  |
| chr2R | 8929078  | 8930534  |
| chr2R | 9045749  | 9046230  |
| chr2R | 9110643  | 9112382  |
| chr2R | 9117684  | 9118508  |
| chr2R | 9351946  | 9353294  |
| chr2R | 9353955  | 9355040  |
| chr2R | 9357683  | 9358620  |
| chr2R | 9360748  | 9361842  |
| chr2R | 9364710  | 9365754  |
| chr2R | 9369943  | 9370814  |
| chr2R | 9453867  | 9454561  |
| chr2R | 9749043  | 9749498  |
| chr2R | 9841180  | 9841679  |
| chr2R | 9844307  | 9845119  |
| chr2R | 9847296  | 9848663  |
| chr2R | 9851138  | 9851691  |
| chr2R | 9879358  | 9880015  |
| chr2R | 9885079  | 9885859  |
| chr2R | 9895666  | 9896248  |
| chr2R | 9961915  | 9963425  |
| chr2R | 10052083 | 10052764 |
| chr2R | 10060703 | 10063410 |
| chr2R | 10072237 | 10073134 |
| chr2R | 10094090 | 10094530 |
| chr2R | 10094666 | 10096396 |
| chr2R | 10097649 | 10098312 |
| chr2R | 10098640 | 10100877 |
| chr2R | 10107300 | 10108614 |
| chr2R | 10152708 | 10153539 |
| chr2R | 10157496 | 10158649 |
| chr2R | 10195588 | 10196576 |
| chr2R | 10201330 | 10202112 |
| chr2R | 10303965 | 10304721 |
| chr2R | 10338268 | 10338955 |
| chr2R | 10341120 | 10342092 |
| chr2R | 10342547 | 10343172 |

|       |          |          |
|-------|----------|----------|
| chr2R | 10343558 | 10344155 |
| chr2R | 10344425 | 10344864 |
| chr2R | 10345410 | 10346317 |
| chr2R | 10349159 | 10350293 |
| chr2R | 10353717 | 10354800 |
| chr2R | 10364728 | 10365424 |
| chr2R | 10391147 | 10391736 |
| chr2R | 10492491 | 10493449 |
| chr2R | 10669902 | 10671153 |
| chr2R | 10686052 | 10687177 |
| chr2R | 10715798 | 10716833 |
| chr2R | 10757705 | 10758181 |
| chr2R | 10822899 | 10823765 |
| chr2R | 10849642 | 10850411 |
| chr2R | 10854052 | 10854801 |
| chr2R | 10873719 | 10874324 |
| chr2R | 10943039 | 10943568 |
| chr2R | 11005901 | 11006957 |
| chr2R | 11018233 | 11018795 |
| chr2R | 11022619 | 11023373 |
| chr2R | 11125402 | 11126186 |
| chr2R | 11139711 | 11140998 |
| chr2R | 11237578 | 11238204 |
| chr2R | 11368722 | 11369261 |
| chr2R | 11369386 | 11370312 |
| chr2R | 11370993 | 11371631 |
| chr2R | 11563235 | 11564244 |
| chr2R | 11627239 | 11628275 |
| chr2R | 11699187 | 11699766 |
| chr2R | 11703843 | 11704317 |
| chr2R | 11704683 | 11705375 |
| chr2R | 11722061 | 11722785 |
| chr2R | 11724047 | 11724594 |
| chr2R | 11734229 | 11735308 |
| chr2R | 11773571 | 11774311 |
| chr2R | 11783472 | 11784106 |
| chr2R | 11804306 | 11805019 |
| chr2R | 12016767 | 12017827 |
| chr2R | 12066558 | 12067013 |
| chr2R | 12084213 | 12084665 |
| chr2R | 12105521 | 12106279 |
| chr2R | 12273905 | 12275107 |
| chr2R | 12275317 | 12276223 |
| chr2R | 12481416 | 12482352 |
| chr2R | 12502475 | 12503050 |
| chr2R | 12604124 | 12605483 |
| chr2R | 12612529 | 12613483 |
| chr2R | 12696358 | 12696880 |
| chr2R | 12715768 | 12716598 |
| chr2R | 12717750 | 12718219 |
| chr2R | 12727736 | 12728512 |
| chr2R | 12743744 | 12744508 |
| chr2R | 12903356 | 12903811 |

|       |          |          |
|-------|----------|----------|
| chr2R | 12914345 | 12916155 |
| chr2R | 12984246 | 12985220 |
| chr2R | 13149662 | 13150575 |
| chr2R | 13279689 | 13280279 |
| chr2R | 13308327 | 13309271 |
| chr2R | 13309721 | 13310198 |
| chr2R | 13345262 | 13346581 |
| chr2R | 13349079 | 13349864 |
| chr2R | 13389743 | 13390426 |
| chr2R | 13422496 | 13423463 |
| chr2R | 13455661 | 13456670 |
| chr2R | 13467144 | 13468060 |
| chr2R | 13570061 | 13570984 |
| chr2R | 13603459 | 13604768 |
| chr2R | 13688809 | 13689651 |
| chr2R | 13692054 | 13692628 |
| chr2R | 13752809 | 13753464 |
| chr2R | 13758230 | 13759166 |
| chr2R | 14028935 | 14029894 |
| chr2R | 14043907 | 14044781 |
| chr2R | 14044848 | 14045883 |
| chr2R | 14047860 | 14048381 |
| chr2R | 14103164 | 14104014 |
| chr2R | 14123586 | 14124823 |
| chr2R | 14129536 | 14130016 |
| chr2R | 14143866 | 14144539 |
| chr2R | 14144599 | 14145747 |
| chr2R | 14157041 | 14157799 |
| chr2R | 14192373 | 14194020 |
| chr2R | 14194489 | 14195551 |
| chr2R | 14196640 | 14197432 |
| chr2R | 14199976 | 14200509 |
| chr2R | 14217320 | 14217771 |
| chr2R | 14233409 | 14234149 |
| chr2R | 14244456 | 14245079 |
| chr2R | 14391173 | 14392248 |
| chr2R | 14416609 | 14417281 |
| chr2R | 14423409 | 14423992 |
| chr2R | 14549321 | 14549812 |
| chr2R | 14693534 | 14694226 |
| chr2R | 14722709 | 14723285 |
| chr2R | 14733831 | 14734426 |
| chr2R | 14858601 | 14859464 |
| chr2R | 15024596 | 15025090 |
| chr2R | 15116676 | 15117484 |
| chr2R | 15141508 | 15142022 |
| chr2R | 15142263 | 15142672 |
| chr2R | 15155994 | 15157009 |
| chr2R | 15162269 | 15163646 |
| chr2R | 15311674 | 15312484 |
| chr2R | 15338311 | 15338834 |
| chr2R | 15343682 | 15344722 |
| chr2R | 15354335 | 15355249 |



|       |          |          |
|-------|----------|----------|
| chr2R | 15355381 | 15356256 |
| chr2R | 15466097 | 15466836 |
| chr2R | 15693069 | 15693782 |
| chr2R | 15714063 | 15714536 |
| chr2R | 15789844 | 15790486 |
| chr2R | 15800798 | 15801324 |
| chr2R | 15857123 | 15857646 |
| chr2R | 15930665 | 15931392 |
| chr2R | 15962052 | 15962673 |
| chr2R | 15980880 | 15981640 |
| chr2R | 16032288 | 16033104 |
| chr2R | 16036882 | 16037819 |
| chr2R | 16089701 | 16090517 |
| chr2R | 16195516 | 16196261 |
| chr2R | 16207328 | 16208011 |
| chr2R | 16468916 | 16469688 |
| chr2R | 16474557 | 16475582 |
| chr2R | 16538632 | 16539680 |
| chr2R | 16540597 | 16541630 |
| chr2R | 16553990 | 16554711 |
| chr2R | 16555046 | 16555655 |
| chr2R | 16790541 | 16791758 |
| chr2R | 16801170 | 16802791 |
| chr2R | 16803518 | 16804751 |
| chr2R | 16883758 | 16884923 |
| chr2R | 16925235 | 16925799 |
| chr2R | 16935409 | 16936204 |
| chr2R | 16961128 | 16961933 |
| chr2R | 16962729 | 16963517 |
| chr2R | 17029168 | 17029665 |
| chr2R | 17046523 | 17048322 |
| chr2R | 17070755 | 17071526 |
| chr2R | 17089367 | 17090348 |
| chr2R | 17136225 | 17136948 |
| chr2R | 17249581 | 17250126 |
| chr2R | 17250293 | 17251348 |
| chr2R | 17251798 | 17252346 |
| chr2R | 17254909 | 17255565 |
| chr2R | 17256618 | 17257547 |
| chr2R | 17266561 | 17267240 |
| chr2R | 17383735 | 17384096 |
| chr2R | 17429388 | 17430746 |
| chr2R | 17438510 | 17439379 |
| chr2R | 17439447 | 17440901 |
| chr2R | 17441440 | 17442013 |
| chr2R | 17533282 | 17534466 |
| chr2R | 17556844 | 17557709 |
| chr2R | 17591509 | 17592116 |
| chr2R | 17601709 | 17602366 |
| chr2R | 17621529 | 17621985 |
| chr2R | 17745863 | 17746423 |
| chr2R | 17786137 | 17787205 |
| chr2R | 17790634 | 17791449 |

|       |          |          |
|-------|----------|----------|
| chr2R | 18066135 | 18066713 |
| chr2R | 18128720 | 18130885 |
| chr2R | 18131336 | 18132628 |
| chr2R | 18144086 | 18144831 |
| chr2R | 18144902 | 18146065 |
| chr2R | 18146150 | 18147448 |
| chr2R | 18148475 | 18149487 |
| chr2R | 18156381 | 18157075 |
| chr2R | 18160347 | 18160895 |
| chr2R | 18198999 | 18199478 |
| chr2R | 18202458 | 18203058 |
| chr2R | 18270557 | 18271350 |
| chr2R | 18284882 | 18285294 |
| chr2R | 18286690 | 18287338 |
| chr2R | 18287413 | 18288181 |
| chr2R | 18432465 | 18433051 |
| chr2R | 18446864 | 18447300 |
| chr2R | 18459766 | 18460806 |
| chr2R | 18493395 | 18494713 |
| chr2R | 18532321 | 18533094 |
| chr2R | 18564299 | 18565118 |
| chr2R | 18565521 | 18566780 |
| chr2R | 18573448 | 18573913 |
| chr2R | 18575517 | 18576948 |
| chr2R | 18577083 | 18577796 |
| chr2R | 18578231 | 18578878 |
| chr2R | 18587299 | 18588230 |
| chr2R | 18693617 | 18694088 |
| chr2R | 18741573 | 18742404 |
| chr2R | 18783788 | 18784160 |
| chr2R | 18821816 | 18822540 |
| chr2R | 18885532 | 18886492 |
| chr2R | 18918046 | 18919286 |
| chr2R | 18929653 | 18930517 |
| chr2R | 18930697 | 18931245 |
| chr2R | 18931481 | 18932077 |
| chr2R | 18933363 | 18934387 |
| chr2R | 18941759 | 18942573 |
| chr2R | 19090837 | 19091546 |
| chr2R | 19127515 | 19128353 |
| chr2R | 19130541 | 19131473 |
| chr2R | 19319601 | 19320124 |
| chr2R | 19489323 | 19489711 |
| chr2R | 19508888 | 19509787 |
| chr2R | 19519172 | 19520479 |
| chr2R | 19523503 | 19525876 |
| chr2R | 19530574 | 19531919 |
| chr2R | 19600613 | 19601783 |
| chr2R | 19705522 | 19706305 |
| chr2R | 19749723 | 19750569 |
| chr2R | 19757988 | 19758657 |
| chr2R | 19759288 | 19760240 |
| chr2R | 19836572 | 19837032 |

|       |          |          |
|-------|----------|----------|
| chr2R | 19865512 | 19866311 |
| chr2R | 19934805 | 19935148 |
| chr2R | 19974040 | 19974849 |
| chr2R | 20125244 | 20126011 |
| chr2R | 20130182 | 20130700 |
| chr2R | 20145525 | 20146158 |
| chr2R | 20225526 | 20226772 |
| chr2R | 20228295 | 20228988 |
| chr2R | 20229433 | 20230239 |
| chr2R | 20231812 | 20232733 |
| chr2R | 20256320 | 20258235 |
| chr2R | 20258852 | 20259763 |
| chr2R | 20431253 | 20432051 |
| chr2R | 20432883 | 20433695 |
| chr2R | 20498914 | 20499324 |
| chr2R | 20630915 | 20631372 |
| chr2R | 20694594 | 20695362 |
| chr2R | 20700371 | 20702869 |
| chr2R | 20707830 | 20708443 |
| chr2R | 20708763 | 20709542 |
| chr2R | 20724163 | 20724595 |
| chr2R | 20731664 | 20732788 |
| chr2R | 20732834 | 20733630 |
| chr2R | 20842932 | 20843530 |
| chr2R | 20844398 | 20845204 |
| chr2R | 20933302 | 20933921 |
| chr2R | 20938385 | 20941332 |
| chr2R | 20941803 | 20942659 |
| chr2R | 20947169 | 20948123 |
| chr2R | 20948269 | 20950001 |
| chr2R | 21002223 | 21004033 |
| chr2R | 21090492 | 21091142 |
| chr2R | 21093394 | 21094153 |
| chr2R | 21102431 | 21103433 |
| chr3L | 19827    | 20523    |
| chr3L | 41496    | 41870    |
| chr3L | 69490    | 69868    |
| chr3L | 73757    | 74450    |
| chr3L | 105197   | 105749   |
| chr3L | 128481   | 128943   |
| chr3L | 131168   | 132020   |
| chr3L | 223788   | 225132   |
| chr3L | 246354   | 247046   |
| chr3L | 258377   | 258964   |
| chr3L | 271168   | 271548   |
| chr3L | 319269   | 320356   |
| chr3L | 347123   | 347707   |
| chr3L | 376424   | 377466   |
| chr3L | 377798   | 379949   |
| chr3L | 382301   | 383018   |
| chr3L | 387006   | 387421   |
| chr3L | 387548   | 388139   |
| chr3L | 389451   | 390451   |

|       |         |         |
|-------|---------|---------|
| chr3L | 392148  | 393313  |
| chr3L | 400595  | 401059  |
| chr3L | 426747  | 427225  |
| chr3L | 429167  | 429832  |
| chr3L | 432382  | 433976  |
| chr3L | 540520  | 541284  |
| chr3L | 545908  | 547019  |
| chr3L | 552406  | 552938  |
| chr3L | 618340  | 619186  |
| chr3L | 619479  | 620460  |
| chr3L | 621252  | 622272  |
| chr3L | 627928  | 628292  |
| chr3L | 639247  | 639916  |
| chr3L | 640318  | 641299  |
| chr3L | 660246  | 661300  |
| chr3L | 698988  | 699517  |
| chr3L | 749187  | 749814  |
| chr3L | 760095  | 761022  |
| chr3L | 799824  | 800509  |
| chr3L | 872393  | 872921  |
| chr3L | 1030566 | 1031418 |
| chr3L | 1031593 | 1032561 |
| chr3L | 1177875 | 1178793 |
| chr3L | 1247510 | 1248193 |
| chr3L | 1265038 | 1265857 |
| chr3L | 1295351 | 1296231 |
| chr3L | 1302549 | 1302980 |
| chr3L | 1319069 | 1320005 |
| chr3L | 1329653 | 1330515 |
| chr3L | 1334659 | 1335302 |
| chr3L | 1341878 | 1342762 |
| chr3L | 1362285 | 1363016 |
| chr3L | 1364238 | 1365479 |
| chr3L | 1366104 | 1366947 |
| chr3L | 1388188 | 1388804 |
| chr3L | 1442433 | 1443504 |
| chr3L | 1457220 | 1457870 |
| chr3L | 1463448 | 1464038 |
| chr3L | 1569190 | 1570175 |
| chr3L | 1577216 | 1578050 |
| chr3L | 1688633 | 1689434 |
| chr3L | 1730079 | 1730656 |
| chr3L | 1738455 | 1738923 |
| chr3L | 1746275 | 1747119 |
| chr3L | 1810299 | 1811373 |
| chr3L | 1827810 | 1828347 |
| chr3L | 1969489 | 1970126 |
| chr3L | 2151695 | 2152305 |
| chr3L | 2164074 | 2164839 |
| chr3L | 2262553 | 2263490 |
| chr3L | 2385551 | 2386699 |
| chr3L | 2393033 | 2393772 |
| chr3L | 2438678 | 2439698 |

|       |         |         |
|-------|---------|---------|
| chr3L | 2488153 | 2488702 |
| chr3L | 2552818 | 2553568 |
| chr3L | 2635060 | 2635772 |
| chr3L | 2773642 | 2774640 |
| chr3L | 2800889 | 2801498 |
| chr3L | 2801839 | 2802517 |
| chr3L | 2808811 | 2809837 |
| chr3L | 2820533 | 2821107 |
| chr3L | 2823280 | 2824130 |
| chr3L | 2830419 | 2831171 |
| chr3L | 2831438 | 2832029 |
| chr3L | 2837807 | 2838396 |
| chr3L | 2846875 | 2848931 |
| chr3L | 2873281 | 2874584 |
| chr3L | 3073544 | 3074234 |
| chr3L | 3077618 | 3078307 |
| chr3L | 3107051 | 3107604 |
| chr3L | 3109487 | 3110285 |
| chr3L | 3197194 | 3197909 |
| chr3L | 3198637 | 3199422 |
| chr3L | 3223330 | 3224002 |
| chr3L | 3225413 | 3226619 |
| chr3L | 3239349 | 3240252 |
| chr3L | 3241956 | 3242545 |
| chr3L | 3246576 | 3247170 |
| chr3L | 3257559 | 3258031 |
| chr3L | 3325620 | 3326507 |
| chr3L | 3341072 | 3341564 |
| chr3L | 3383970 | 3384523 |
| chr3L | 3389319 | 3390034 |
| chr3L | 3391003 | 3392672 |
| chr3L | 3394513 | 3395254 |
| chr3L | 3512031 | 3512678 |
| chr3L | 3536884 | 3537842 |
| chr3L | 3623324 | 3623987 |
| chr3L | 3624719 | 3625443 |
| chr3L | 3625966 | 3627152 |
| chr3L | 3784976 | 3785631 |
| chr3L | 3810870 | 3811622 |
| chr3L | 3845035 | 3845839 |
| chr3L | 3846066 | 3846716 |
| chr3L | 3952546 | 3953811 |
| chr3L | 4070000 | 4071857 |
| chr3L | 4120607 | 4121058 |
| chr3L | 4156689 | 4157203 |
| chr3L | 4160257 | 4161066 |
| chr3L | 4222678 | 4223284 |
| chr3L | 4227450 | 4228148 |
| chr3L | 4239445 | 4240235 |
| chr3L | 4252368 | 4253634 |
| chr3L | 4384226 | 4384807 |
| chr3L | 4407617 | 4408358 |
| chr3L | 4408766 | 4409582 |

|       |         |         |
|-------|---------|---------|
| chr3L | 4671782 | 4672517 |
| chr3L | 5269912 | 5270979 |
| chr3L | 5353229 | 5353970 |
| chr3L | 5543903 | 5544529 |
| chr3L | 5563861 | 5564715 |
| chr3L | 5576098 | 5577095 |
| chr3L | 5604488 | 5605570 |
| chr3L | 5614840 | 5615992 |
| chr3L | 5626371 | 5627857 |
| chr3L | 5743077 | 5744272 |
| chr3L | 5744534 | 5745289 |
| chr3L | 5795048 | 5795882 |
| chr3L | 5824738 | 5825958 |
| chr3L | 5837058 | 5837903 |
| chr3L | 5844986 | 5845624 |
| chr3L | 5845869 | 5848542 |
| chr3L | 5859777 | 5861346 |
| chr3L | 5919610 | 5920597 |
| chr3L | 6036332 | 6037002 |
| chr3L | 6058841 | 6059628 |
| chr3L | 6177553 | 6178344 |
| chr3L | 6181707 | 6182355 |
| chr3L | 6210537 | 6211968 |
| chr3L | 6242829 | 6243505 |
| chr3L | 6296036 | 6296615 |
| chr3L | 6337373 | 6338038 |
| chr3L | 6465161 | 6465672 |
| chr3L | 6696119 | 6696704 |
| chr3L | 6772419 | 6772878 |
| chr3L | 6782526 | 6783917 |
| chr3L | 6817458 | 6817943 |
| chr3L | 6839834 | 6840859 |
| chr3L | 6855776 | 6856481 |
| chr3L | 6896785 | 6897552 |
| chr3L | 6929707 | 6930729 |
| chr3L | 6957041 | 6958048 |
| chr3L | 7341101 | 7342190 |
| chr3L | 7361485 | 7362180 |
| chr3L | 7427719 | 7428660 |
| chr3L | 7711927 | 7712902 |
| chr3L | 7721023 | 7721889 |
| chr3L | 7856423 | 7856808 |
| chr3L | 7863389 | 7863897 |
| chr3L | 7903925 | 7904823 |
| chr3L | 7940520 | 7941819 |
| chr3L | 8006356 | 8006997 |
| chr3L | 8051356 | 8051874 |
| chr3L | 8054282 | 8054742 |
| chr3L | 8149381 | 8150207 |
| chr3L | 8414432 | 8415170 |
| chr3L | 8435023 | 8435522 |
| chr3L | 8568639 | 8569264 |
| chr3L | 8649437 | 8651087 |

|       |          |          |
|-------|----------|----------|
| chr3L | 8652058  | 8652788  |
| chr3L | 8661671  | 8662565  |
| chr3L | 8695053  | 8695887  |
| chr3L | 8759042  | 8760098  |
| chr3L | 8766259  | 8766729  |
| chr3L | 8767867  | 8768500  |
| chr3L | 8813989  | 8814939  |
| chr3L | 8815608  | 8816405  |
| chr3L | 8818285  | 8818957  |
| chr3L | 8820419  | 8820948  |
| chr3L | 8945812  | 8947479  |
| chr3L | 8990230  | 8991315  |
| chr3L | 8997614  | 8999190  |
| chr3L | 9000209  | 9001966  |
| chr3L | 9006236  | 9007247  |
| chr3L | 9009724  | 9010482  |
| chr3L | 9011130  | 9013347  |
| chr3L | 9014828  | 9015225  |
| chr3L | 9017016  | 9018537  |
| chr3L | 9031547  | 9032135  |
| chr3L | 9033582  | 9035472  |
| chr3L | 9365139  | 9365773  |
| chr3L | 9371106  | 9372458  |
| chr3L | 9372646  | 9374129  |
| chr3L | 9374389  | 9375125  |
| chr3L | 9394498  | 9395733  |
| chr3L | 9423289  | 9423932  |
| chr3L | 9439797  | 9440410  |
| chr3L | 9502165  | 9502790  |
| chr3L | 9540168  | 9540786  |
| chr3L | 9685412  | 9686375  |
| chr3L | 9689181  | 9690803  |
| chr3L | 9735666  | 9736426  |
| chr3L | 9736512  | 9737231  |
| chr3L | 9756625  | 9756993  |
| chr3L | 9847454  | 9848289  |
| chr3L | 9848832  | 9849260  |
| chr3L | 9891962  | 9893332  |
| chr3L | 9960991  | 9962242  |
| chr3L | 10380200 | 10380926 |
| chr3L | 10526527 | 10527497 |
| chr3L | 10658218 | 10660241 |
| chr3L | 10667202 | 10667749 |
| chr3L | 10668204 | 10668770 |
| chr3L | 10675147 | 10675788 |
| chr3L | 10676309 | 10677066 |
| chr3L | 10704880 | 10705471 |
| chr3L | 10732825 | 10733927 |
| chr3L | 10753812 | 10754745 |
| chr3L | 10759204 | 10760357 |
| chr3L | 10768961 | 10769507 |
| chr3L | 10843171 | 10843745 |
| chr3L | 10845456 | 10846370 |

|       |          |          |
|-------|----------|----------|
| chr3L | 10848237 | 10848964 |
| chr3L | 10849662 | 10850145 |
| chr3L | 10855818 | 10856567 |
| chr3L | 10890912 | 10891918 |
| chr3L | 10910812 | 10911603 |
| chr3L | 10933475 | 10934547 |
| chr3L | 10945317 | 10946300 |
| chr3L | 10961809 | 10962432 |
| chr3L | 11002463 | 11002986 |
| chr3L | 11003537 | 11004360 |
| chr3L | 11090997 | 11091702 |
| chr3L | 11112467 | 11113438 |
| chr3L | 11116493 | 11117480 |
| chr3L | 11145921 | 11146535 |
| chr3L | 11245401 | 11246220 |
| chr3L | 11272376 | 11272910 |
| chr3L | 11357790 | 11358963 |
| chr3L | 11362921 | 11363349 |
| chr3L | 11554104 | 11554963 |
| chr3L | 11555215 | 11555873 |
| chr3L | 11579583 | 11580995 |
| chr3L | 11709246 | 11709725 |
| chr3L | 11920127 | 11921175 |
| chr3L | 12046558 | 12047230 |
| chr3L | 12074464 | 12074970 |
| chr3L | 12139582 | 12140608 |
| chr3L | 12259069 | 12259482 |
| chr3L | 12380409 | 12380814 |
| chr3L | 12400589 | 12402136 |
| chr3L | 12413520 | 12414309 |
| chr3L | 12421175 | 12421822 |
| chr3L | 12426725 | 12427492 |
| chr3L | 12449721 | 12450392 |
| chr3L | 12460849 | 12461790 |
| chr3L | 12507533 | 12509412 |
| chr3L | 12527070 | 12527849 |
| chr3L | 12550803 | 12551671 |
| chr3L | 12552297 | 12553007 |
| chr3L | 12572921 | 12573814 |
| chr3L | 12575831 | 12577644 |
| chr3L | 12589938 | 12590634 |
| chr3L | 12601060 | 12601688 |
| chr3L | 12602229 | 12603155 |
| chr3L | 12603453 | 12603989 |
| chr3L | 12605621 | 12606056 |
| chr3L | 12608773 | 12609818 |
| chr3L | 12620422 | 12621291 |
| chr3L | 12636635 | 12637544 |
| chr3L | 12644550 | 12645162 |
| chr3L | 12645916 | 12646894 |
| chr3L | 12653480 | 12654910 |
| chr3L | 12655755 | 12656582 |
| chr3L | 12668228 | 12668691 |



|       |          |          |
|-------|----------|----------|
| chr3L | 12682940 | 12684511 |
| chr3L | 12684884 | 12687339 |
| chr3L | 12687753 | 12688389 |
| chr3L | 12723694 | 12724089 |
| chr3L | 13021622 | 13022772 |
| chr3L | 13104109 | 13104997 |
| chr3L | 13106673 | 13107103 |
| chr3L | 13165438 | 13166185 |
| chr3L | 13175478 | 13176309 |
| chr3L | 13221684 | 13222215 |
| chr3L | 13397217 | 13398265 |
| chr3L | 13491993 | 13493330 |
| chr3L | 13956876 | 13958078 |
| chr3L | 14030178 | 14031324 |
| chr3L | 14043679 | 14044577 |
| chr3L | 14124211 | 14125657 |
| chr3L | 14125708 | 14127392 |
| chr3L | 14139694 | 14140123 |
| chr3L | 14159044 | 14159731 |
| chr3L | 14169789 | 14170673 |
| chr3L | 14170775 | 14171744 |
| chr3L | 14207940 | 14208597 |
| chr3L | 14212576 | 14213170 |
| chr3L | 14314124 | 14314607 |
| chr3L | 14328223 | 14328920 |
| chr3L | 14403547 | 14404101 |
| chr3L | 14416403 | 14417119 |
| chr3L | 14417952 | 14418681 |
| chr3L | 14537026 | 14537852 |
| chr3L | 14543735 | 14544490 |
| chr3L | 14571872 | 14572701 |
| chr3L | 14575487 | 14576075 |
| chr3L | 14580626 | 14581171 |
| chr3L | 14589619 | 14590185 |
| chr3L | 14592408 | 14593163 |
| chr3L | 14593471 | 14594219 |
| chr3L | 14615823 | 14616189 |
| chr3L | 14626946 | 14627717 |
| chr3L | 14629788 | 14630274 |
| chr3L | 14630875 | 14631694 |
| chr3L | 14638864 | 14639818 |
| chr3L | 14649505 | 14649943 |
| chr3L | 14736435 | 14736936 |
| chr3L | 14749495 | 14750795 |
| chr3L | 14751863 | 14752699 |
| chr3L | 14768630 | 14769329 |
| chr3L | 14783092 | 14783632 |
| chr3L | 14965925 | 14966899 |
| chr3L | 14971565 | 14972091 |
| chr3L | 14985014 | 14985499 |
| chr3L | 15096870 | 15099123 |
| chr3L | 15100267 | 15100939 |
| chr3L | 15101124 | 15101603 |

|       |          |          |
|-------|----------|----------|
| chr3L | 15192027 | 15192577 |
| chr3L | 15223279 | 15224101 |
| chr3L | 15226916 | 15227508 |
| chr3L | 15241430 | 15242142 |
| chr3L | 15252882 | 15254104 |
| chr3L | 15493653 | 15494556 |
| chr3L | 15526356 | 15527072 |
| chr3L | 15527175 | 15528190 |
| chr3L | 15537737 | 15538584 |
| chr3L | 15721641 | 15722438 |
| chr3L | 15748303 | 15748990 |
| chr3L | 16017708 | 16018448 |
| chr3L | 16038696 | 16040361 |
| chr3L | 16041274 | 16041953 |
| chr3L | 16121476 | 16122034 |
| chr3L | 16156462 | 16157355 |
| chr3L | 16167244 | 16167700 |
| chr3L | 16196591 | 16197200 |
| chr3L | 16273031 | 16273680 |
| chr3L | 16374333 | 16375082 |
| chr3L | 16402260 | 16404159 |
| chr3L | 16482291 | 16482683 |
| chr3L | 16482877 | 16484033 |
| chr3L | 16581256 | 16581809 |
| chr3L | 16640327 | 16641294 |
| chr3L | 16751459 | 16752214 |
| chr3L | 16762480 | 16763393 |
| chr3L | 16846733 | 16847443 |
| chr3L | 16858333 | 16858994 |
| chr3L | 16883532 | 16884423 |
| chr3L | 16968159 | 16968720 |
| chr3L | 16979403 | 16980128 |
| chr3L | 17002918 | 17003560 |
| chr3L | 17371664 | 17372511 |
| chr3L | 17385107 | 17385994 |
| chr3L | 17403741 | 17404497 |
| chr3L | 17413764 | 17414709 |
| chr3L | 17481899 | 17482880 |
| chr3L | 17495026 | 17496084 |
| chr3L | 17556939 | 17557579 |
| chr3L | 17570719 | 17571544 |
| chr3L | 17571981 | 17573127 |
| chr3L | 17583291 | 17584308 |
| chr3L | 17604888 | 17605850 |
| chr3L | 17637606 | 17638313 |
| chr3L | 17660906 | 17661470 |
| chr3L | 17888607 | 17889184 |
| chr3L | 17961389 | 17962180 |
| chr3L | 17985234 | 17986174 |
| chr3L | 18000225 | 18000993 |
| chr3L | 18132538 | 18133111 |
| chr3L | 18178905 | 18179283 |
| chr3L | 18187006 | 18187771 |

|       |          |          |
|-------|----------|----------|
| chr3L | 18188873 | 18189904 |
| chr3L | 18229837 | 18230252 |
| chr3L | 18233727 | 18234761 |
| chr3L | 18391053 | 18391972 |
| chr3L | 18393028 | 18394236 |
| chr3L | 18396116 | 18396823 |
| chr3L | 18752091 | 18752798 |
| chr3L | 18761996 | 18762652 |
| chr3L | 18812076 | 18812902 |
| chr3L | 18883824 | 18884412 |
| chr3L | 18891004 | 18891447 |
| chr3L | 18981569 | 18982168 |
| chr3L | 19014138 | 19015184 |
| chr3L | 19026563 | 19027296 |
| chr3L | 19034271 | 19034897 |
| chr3L | 19035892 | 19036457 |
| chr3L | 19037481 | 19038264 |
| chr3L | 19039828 | 19040285 |
| chr3L | 19072442 | 19074183 |
| chr3L | 19133277 | 19133897 |
| chr3L | 19162708 | 19163839 |
| chr3L | 19164840 | 19165879 |
| chr3L | 19247826 | 19248553 |
| chr3L | 19549351 | 19550284 |
| chr3L | 19551558 | 19551957 |
| chr3L | 19552911 | 19553495 |
| chr3L | 19553578 | 19554128 |
| chr3L | 19555483 | 19556835 |
| chr3L | 19654771 | 19655727 |
| chr3L | 19655890 | 19657505 |
| chr3L | 19657882 | 19658974 |
| chr3L | 19659620 | 19660106 |
| chr3L | 19663967 | 19664862 |
| chr3L | 19667496 | 19668186 |
| chr3L | 19669126 | 19669946 |
| chr3L | 19670692 | 19671670 |
| chr3L | 19674670 | 19675429 |
| chr3L | 19675710 | 19677004 |
| chr3L | 19677228 | 19677847 |
| chr3L | 19687875 | 19689459 |
| chr3L | 19696487 | 19697336 |
| chr3L | 19697609 | 19698408 |
| chr3L | 19699956 | 19700497 |
| chr3L | 19700594 | 19701569 |
| chr3L | 19784263 | 19784644 |
| chr3L | 19799871 | 19800444 |
| chr3L | 19863514 | 19864817 |
| chr3L | 19888363 | 19891006 |
| chr3L | 19896151 | 19896601 |
| chr3L | 19896883 | 19897959 |
| chr3L | 19900599 | 19901854 |
| chr3L | 19901899 | 19902826 |
| chr3L | 19999951 | 20000552 |

|       |          |          |
|-------|----------|----------|
| chr3L | 20190709 | 20191541 |
| chr3L | 20234139 | 20235004 |
| chr3L | 20302871 | 20303825 |
| chr3L | 20368966 | 20369544 |
| chr3L | 20395897 | 20396933 |
| chr3L | 20532518 | 20533199 |
| chr3L | 20593270 | 20594240 |
| chr3L | 20599519 | 20600038 |
| chr3L | 20613199 | 20613931 |
| chr3L | 20614702 | 20615830 |
| chr3L | 20617031 | 20617488 |
| chr3L | 20649409 | 20650315 |
| chr3L | 20655341 | 20656016 |
| chr3L | 20680202 | 20681175 |
| chr3L | 20681263 | 20681880 |
| chr3L | 20687099 | 20688772 |
| chr3L | 20723825 | 20724475 |
| chr3L | 20941887 | 20943188 |
| chr3L | 20943258 | 20943951 |
| chr3L | 21000853 | 21001509 |
| chr3L | 21002009 | 21002546 |
| chr3L | 21007285 | 21008280 |
| chr3L | 21018183 | 21020489 |
| chr3L | 21092269 | 21093479 |
| chr3L | 21195376 | 21196478 |
| chr3L | 21245273 | 21246097 |
| chr3L | 21246249 | 21247752 |
| chr3L | 21248169 | 21248779 |
| chr3L | 21270227 | 21270791 |
| chr3L | 21291074 | 21291810 |
| chr3L | 21377096 | 21378111 |
| chr3L | 21412104 | 21412993 |
| chr3L | 21426222 | 21426960 |
| chr3L | 21453201 | 21454243 |
| chr3L | 21469734 | 21470405 |
| chr3L | 21472672 | 21473282 |
| chr3L | 21590917 | 21592770 |
| chr3L | 21629699 | 21630478 |
| chr3L | 21634905 | 21635678 |
| chr3L | 21721295 | 21722099 |
| chr3L | 21796144 | 21797031 |
| chr3L | 21797496 | 21798055 |
| chr3L | 21799940 | 21801337 |
| chr3L | 22152123 | 22152934 |
| chr3L | 22168230 | 22168920 |
| chr3L | 22169514 | 22170312 |
| chr3L | 22172438 | 22173190 |
| chr3L | 22173760 | 22175082 |
| chr3L | 22387157 | 22387877 |
| chr3L | 22458787 | 22459304 |
| chr3L | 22740189 | 22740968 |
| chr3L | 22765425 | 22766235 |
| chr3L | 22827303 | 22828279 |

|       |          |          |
|-------|----------|----------|
| chr3L | 22828416 | 22829312 |
| chr3L | 22831388 | 22832142 |
| chr3L | 22856840 | 22857509 |
| chr3L | 22857717 | 22858230 |
| chr3L | 22871804 | 22872210 |
| chr3L | 23224183 | 23224901 |
| chr3L | 23731524 | 23732093 |
| chr3R | 12581    | 13469    |
| chr3R | 22909    | 23420    |
| chr3R | 228923   | 229395   |
| chr3R | 254474   | 255158   |
| chr3R | 276856   | 277845   |
| chr3R | 471301   | 471681   |
| chr3R | 564783   | 565357   |
| chr3R | 632282   | 632948   |
| chr3R | 637179   | 637855   |
| chr3R | 646543   | 647489   |
| chr3R | 659730   | 661866   |
| chr3R | 662743   | 663336   |
| chr3R | 665429   | 666277   |
| chr3R | 677576   | 679649   |
| chr3R | 686939   | 687491   |
| chr3R | 696772   | 697804   |
| chr3R | 704080   | 704710   |
| chr3R | 708377   | 709940   |
| chr3R | 711888   | 712812   |
| chr3R | 721413   | 721862   |
| chr3R | 726581   | 728011   |
| chr3R | 796313   | 796947   |
| chr3R | 868329   | 869427   |
| chr3R | 870804   | 871503   |
| chr3R | 912443   | 914332   |
| chr3R | 917203   | 917773   |
| chr3R | 943277   | 943990   |
| chr3R | 1014656  | 1015603  |
| chr3R | 1026026  | 1026686  |
| chr3R | 1038704  | 1039751  |
| chr3R | 1041625  | 1042494  |
| chr3R | 1057644  | 1058636  |
| chr3R | 1089709  | 1090988  |
| chr3R | 1108382  | 1109447  |
| chr3R | 1157312  | 1158319  |
| chr3R | 1218041  | 1218433  |
| chr3R | 1342260  | 1343846  |
| chr3R | 1424932  | 1426253  |
| chr3R | 1449061  | 1449732  |
| chr3R | 1473086  | 1474495  |
| chr3R | 1509538  | 1510444  |
| chr3R | 1567708  | 1568456  |
| chr3R | 1580249  | 1580934  |
| chr3R | 1584476  | 1585114  |
| chr3R | 1604293  | 1604832  |
| chr3R | 1614517  | 1615207  |

|       |         |         |
|-------|---------|---------|
| chr3R | 1617091 | 1618012 |
| chr3R | 2036588 | 2037071 |
| chr3R | 2193632 | 2194297 |
| chr3R | 2226395 | 2227256 |
| chr3R | 2232165 | 2233208 |
| chr3R | 2502885 | 2504862 |
| chr3R | 2508654 | 2509099 |
| chr3R | 2566922 | 2567427 |
| chr3R | 2567934 | 2568605 |
| chr3R | 2574905 | 2575853 |
| chr3R | 2616352 | 2616986 |
| chr3R | 2617227 | 2617802 |
| chr3R | 2658333 | 2659348 |
| chr3R | 2665243 | 2665859 |
| chr3R | 2673593 | 2674548 |
| chr3R | 2675218 | 2676518 |
| chr3R | 2716439 | 2716821 |
| chr3R | 2718754 | 2720177 |
| chr3R | 2728365 | 2729006 |
| chr3R | 2729281 | 2730115 |
| chr3R | 2738621 | 2739079 |
| chr3R | 2740148 | 2740690 |
| chr3R | 2761798 | 2762638 |
| chr3R | 2765144 | 2766095 |
| chr3R | 2777610 | 2779076 |
| chr3R | 2791034 | 2791639 |
| chr3R | 2792130 | 2792998 |
| chr3R | 2794891 | 2795304 |
| chr3R | 2795826 | 2796291 |
| chr3R | 2813510 | 2814216 |
| chr3R | 2817432 | 2818018 |
| chr3R | 2824304 | 2825460 |
| chr3R | 2826076 | 2827108 |
| chr3R | 2861466 | 2862113 |
| chr3R | 2862583 | 2863849 |
| chr3R | 2864099 | 2864714 |
| chr3R | 2867601 | 2868431 |
| chr3R | 2892827 | 2893680 |
| chr3R | 2900336 | 2901190 |
| chr3R | 2916020 | 2916467 |
| chr3R | 2934477 | 2935201 |
| chr3R | 2988576 | 2989804 |
| chr3R | 3133534 | 3134316 |
| chr3R | 3134778 | 3135607 |
| chr3R | 3138280 | 3139437 |
| chr3R | 3147591 | 3148649 |
| chr3R | 3157128 | 3157772 |
| chr3R | 3161717 | 3162250 |
| chr3R | 3300320 | 3300905 |
| chr3R | 3454931 | 3455625 |
| chr3R | 3619720 | 3620232 |
| chr3R | 3733027 | 3733606 |
| chr3R | 3761236 | 3762150 |

|       |         |         |
|-------|---------|---------|
| chr3R | 3762328 | 3763412 |
| chr3R | 3788087 | 3788744 |
| chr3R | 3788939 | 3789557 |
| chr3R | 3794828 | 3795618 |
| chr3R | 3855400 | 3856538 |
| chr3R | 3948449 | 3949377 |
| chr3R | 3956591 | 3958500 |
| chr3R | 3960812 | 3961319 |
| chr3R | 3967313 | 3968286 |
| chr3R | 3978635 | 3979263 |
| chr3R | 3983588 | 3984527 |
| chr3R | 3985425 | 3986104 |
| chr3R | 3990192 | 3990799 |
| chr3R | 3998507 | 3999111 |
| chr3R | 3999427 | 4000236 |
| chr3R | 4006412 | 4008411 |
| chr3R | 4015357 | 4016017 |
| chr3R | 4016237 | 4017515 |
| chr3R | 4049358 | 4049779 |
| chr3R | 4102861 | 4104373 |
| chr3R | 4157275 | 4158396 |
| chr3R | 4158775 | 4159850 |
| chr3R | 4160122 | 4160930 |
| chr3R | 4168807 | 4169505 |
| chr3R | 4175153 | 4176015 |
| chr3R | 4302941 | 4303463 |
| chr3R | 4476472 | 4476850 |
| chr3R | 4494945 | 4495744 |
| chr3R | 4495947 | 4496666 |
| chr3R | 4502362 | 4502848 |
| chr3R | 4541281 | 4542360 |
| chr3R | 4572819 | 4574101 |
| chr3R | 4637189 | 4637874 |
| chr3R | 4645179 | 4645760 |
| chr3R | 4701896 | 4702681 |
| chr3R | 4706183 | 4706560 |
| chr3R | 4751349 | 4751931 |
| chr3R | 4752680 | 4753581 |
| chr3R | 4757595 | 4758130 |
| chr3R | 4794844 | 4795661 |
| chr3R | 4839657 | 4840428 |
| chr3R | 4840809 | 4841173 |
| chr3R | 4856746 | 4857941 |
| chr3R | 4876260 | 4876674 |
| chr3R | 4881672 | 4882884 |
| chr3R | 4983419 | 4984063 |
| chr3R | 5052440 | 5052970 |
| chr3R | 5054576 | 5055398 |
| chr3R | 5061817 | 5062230 |
| chr3R | 5164840 | 5165298 |
| chr3R | 5173809 | 5174317 |
| chr3R | 5179324 | 5179971 |
| chr3R | 5204529 | 5205512 |

|       |         |         |
|-------|---------|---------|
| chr3R | 5219177 | 5220231 |
| chr3R | 5255855 | 5256465 |
| chr3R | 5328796 | 5329582 |
| chr3R | 5385029 | 5385594 |
| chr3R | 5399919 | 5400532 |
| chr3R | 5412354 | 5412720 |
| chr3R | 5416708 | 5417369 |
| chr3R | 5452577 | 5453070 |
| chr3R | 5503238 | 5504399 |
| chr3R | 5573378 | 5574171 |
| chr3R | 5589166 | 5589743 |
| chr3R | 5593294 | 5594254 |
| chr3R | 5754044 | 5754429 |
| chr3R | 5811114 | 5811989 |
| chr3R | 5874129 | 5874826 |
| chr3R | 5906049 | 5906835 |
| chr3R | 5907301 | 5907984 |
| chr3R | 5908098 | 5909304 |
| chr3R | 5912679 | 5913792 |
| chr3R | 5913872 | 5914426 |
| chr3R | 5958985 | 5960083 |
| chr3R | 5970253 | 5970927 |
| chr3R | 6014628 | 6015559 |
| chr3R | 6094435 | 6094858 |
| chr3R | 6181590 | 6182052 |
| chr3R | 6262566 | 6263151 |
| chr3R | 6301089 | 6301889 |
| chr3R | 6344216 | 6344923 |
| chr3R | 6353211 | 6353620 |
| chr3R | 6356122 | 6356980 |
| chr3R | 6375785 | 6376198 |
| chr3R | 6382656 | 6383361 |
| chr3R | 6399210 | 6399982 |
| chr3R | 6404698 | 6405623 |
| chr3R | 6413929 | 6414581 |
| chr3R | 6419841 | 6420801 |
| chr3R | 6428888 | 6429708 |
| chr3R | 6439257 | 6440229 |
| chr3R | 6440398 | 6441032 |
| chr3R | 6442581 | 6443231 |
| chr3R | 6447771 | 6448559 |
| chr3R | 6476015 | 6476510 |
| chr3R | 6482013 | 6482593 |
| chr3R | 6485459 | 6486082 |
| chr3R | 6490217 | 6491540 |
| chr3R | 6497740 | 6498392 |
| chr3R | 6503305 | 6503826 |
| chr3R | 6586706 | 6587533 |
| chr3R | 6589843 | 6590564 |
| chr3R | 6613879 | 6614623 |
| chr3R | 6707393 | 6708220 |
| chr3R | 6712360 | 6712904 |
| chr3R | 6714177 | 6715044 |



|       |         |         |
|-------|---------|---------|
| chr3R | 7030444 | 7031403 |
| chr3R | 7035678 | 7036402 |
| chr3R | 7036935 | 7037581 |
| chr3R | 7069138 | 7070305 |
| chr3R | 7179123 | 7179968 |
| chr3R | 7197364 | 7198683 |
| chr3R | 7275491 | 7276088 |
| chr3R | 7387427 | 7388639 |
| chr3R | 7451982 | 7452909 |
| chr3R | 7475337 | 7476561 |
| chr3R | 7481832 | 7482535 |
| chr3R | 7575266 | 7575854 |
| chr3R | 7585854 | 7586528 |
| chr3R | 7586581 | 7587650 |
| chr3R | 7589023 | 7590216 |
| chr3R | 7604623 | 7605738 |
| chr3R | 7684863 | 7685889 |
| chr3R | 7694268 | 7695262 |
| chr3R | 7695863 | 7696465 |
| chr3R | 7712298 | 7713909 |
| chr3R | 7728287 | 7728851 |
| chr3R | 7788255 | 7789560 |
| chr3R | 7818542 | 7819292 |
| chr3R | 8070248 | 8070803 |
| chr3R | 8075776 | 8076508 |
| chr3R | 8095395 | 8096124 |
| chr3R | 8104027 | 8105447 |
| chr3R | 8106280 | 8106970 |
| chr3R | 8111748 | 8112666 |
| chr3R | 8133527 | 8134142 |
| chr3R | 8194447 | 8194893 |
| chr3R | 8269298 | 8270182 |
| chr3R | 8523211 | 8523639 |
| chr3R | 8537538 | 8538869 |
| chr3R | 8786897 | 8787351 |
| chr3R | 8806738 | 8807337 |
| chr3R | 8823501 | 8824403 |
| chr3R | 8837363 | 8839179 |
| chr3R | 8841450 | 8842850 |
| chr3R | 8877639 | 8878301 |
| chr3R | 8889357 | 8890586 |
| chr3R | 8890886 | 8891585 |
| chr3R | 9089334 | 9090082 |
| chr3R | 9212719 | 9213720 |
| chr3R | 9227078 | 9227647 |
| chr3R | 9242384 | 9243132 |
| chr3R | 9279206 | 9280062 |
| chr3R | 9351288 | 9352354 |
| chr3R | 9486537 | 9487303 |
| chr3R | 9509607 | 9510601 |
| chr3R | 9540671 | 9541622 |
| chr3R | 9622062 | 9622963 |
| chr3R | 9636943 | 9637828 |

|       |          |          |
|-------|----------|----------|
| chr3R | 9675201  | 9675825  |
| chr3R | 9678805  | 9679421  |
| chr3R | 9694270  | 9695259  |
| chr3R | 9700150  | 9701129  |
| chr3R | 9701725  | 9702576  |
| chr3R | 9702645  | 9704242  |
| chr3R | 9726962  | 9728880  |
| chr3R | 9734936  | 9735579  |
| chr3R | 9742423  | 9743575  |
| chr3R | 9746854  | 9748127  |
| chr3R | 9781559  | 9782636  |
| chr3R | 9801745  | 9802397  |
| chr3R | 9809185  | 9809603  |
| chr3R | 9837528  | 9838143  |
| chr3R | 9856909  | 9857823  |
| chr3R | 9860981  | 9861977  |
| chr3R | 9882556  | 9883265  |
| chr3R | 10106493 | 10107680 |
| chr3R | 10112310 | 10112825 |
| chr3R | 10114711 | 10115768 |
| chr3R | 10141531 | 10142328 |
| chr3R | 10179777 | 10180326 |
| chr3R | 10188684 | 10189510 |
| chr3R | 10195132 | 10196097 |
| chr3R | 10198948 | 10199539 |
| chr3R | 10205632 | 10206342 |
| chr3R | 10324649 | 10325592 |
| chr3R | 10449854 | 10451160 |
| chr3R | 10474889 | 10475601 |
| chr3R | 10480577 | 10482610 |
| chr3R | 10504001 | 10504709 |
| chr3R | 10541421 | 10542545 |
| chr3R | 10564049 | 10564494 |
| chr3R | 10566029 | 10566936 |
| chr3R | 10621794 | 10622541 |
| chr3R | 10643391 | 10644316 |
| chr3R | 10720185 | 10720762 |
| chr3R | 10919435 | 10921641 |
| chr3R | 10972089 | 10973376 |
| chr3R | 11022034 | 11022783 |
| chr3R | 11032009 | 11032455 |
| chr3R | 11100592 | 11101040 |
| chr3R | 11116089 | 11116998 |
| chr3R | 11170937 | 11171849 |
| chr3R | 11252574 | 11254231 |
| chr3R | 11259876 | 11260833 |
| chr3R | 11283303 | 11283932 |
| chr3R | 11379258 | 11380275 |
| chr3R | 11380813 | 11381363 |
| chr3R | 11414705 | 11415451 |
| chr3R | 11459318 | 11461029 |
| chr3R | 11468474 | 11469570 |
| chr3R | 11469613 | 11470759 |

|       |          |          |
|-------|----------|----------|
| chr3R | 11473451 | 11474010 |
| chr3R | 11475280 | 11476050 |
| chr3R | 11490303 | 11491046 |
| chr3R | 11492852 | 11493782 |
| chr3R | 11619555 | 11620471 |
| chr3R | 11745202 | 11746051 |
| chr3R | 11798625 | 11799813 |
| chr3R | 11815104 | 11815615 |
| chr3R | 11823086 | 11823952 |
| chr3R | 11849187 | 11850574 |
| chr3R | 11851148 | 11852433 |
| chr3R | 11863421 | 11864154 |
| chr3R | 11864551 | 11865066 |
| chr3R | 11867242 | 11867885 |
| chr3R | 11936218 | 11937301 |
| chr3R | 11972466 | 11973087 |
| chr3R | 12048002 | 12048381 |
| chr3R | 12056949 | 12058655 |
| chr3R | 12060177 | 12061695 |
| chr3R | 12062756 | 12063753 |
| chr3R | 12075396 | 12076604 |
| chr3R | 12078301 | 12078778 |
| chr3R | 12100088 | 12100659 |
| chr3R | 12106234 | 12107070 |
| chr3R | 12107403 | 12107808 |
| chr3R | 12142707 | 12143210 |
| chr3R | 12221324 | 12221831 |
| chr3R | 12228496 | 12230799 |
| chr3R | 12239244 | 12240133 |
| chr3R | 12249120 | 12249956 |
| chr3R | 12450348 | 12450918 |
| chr3R | 12480993 | 12481717 |
| chr3R | 12528313 | 12528924 |
| chr3R | 12545540 | 12546827 |
| chr3R | 12589174 | 12590447 |
| chr3R | 12623461 | 12623957 |
| chr3R | 12636604 | 12638172 |
| chr3R | 12655590 | 12656559 |
| chr3R | 12683299 | 12684036 |
| chr3R | 12695063 | 12695816 |
| chr3R | 12708174 | 12708894 |
| chr3R | 12711939 | 12712381 |
| chr3R | 12725225 | 12725915 |
| chr3R | 12746032 | 12747029 |
| chr3R | 12759608 | 12760060 |
| chr3R | 12760363 | 12760972 |
| chr3R | 12770832 | 12771391 |
| chr3R | 12774188 | 12775211 |
| chr3R | 12784293 | 12785053 |
| chr3R | 12788993 | 12789410 |
| chr3R | 12795005 | 12795364 |
| chr3R | 12817226 | 12818002 |
| chr3R | 12863679 | 12864240 |

|       |          |          |
|-------|----------|----------|
| chr3R | 12878402 | 12878939 |
| chr3R | 12879767 | 12880374 |
| chr3R | 12881725 | 12882899 |
| chr3R | 12884610 | 12885842 |
| chr3R | 12887190 | 12888362 |
| chr3R | 12888766 | 12889175 |
| chr3R | 12889805 | 12890271 |
| chr3R | 12890433 | 12891416 |
| chr3R | 12936790 | 12937412 |
| chr3R | 12942928 | 12943548 |
| chr3R | 13251409 | 13252161 |
| chr3R | 13260551 | 13261118 |
| chr3R | 13365022 | 13366196 |
| chr3R | 13504390 | 13505101 |
| chr3R | 13506150 | 13506736 |
| chr3R | 13525313 | 13525991 |
| chr3R | 13526657 | 13527321 |
| chr3R | 13536305 | 13536985 |
| chr3R | 13543347 | 13544392 |
| chr3R | 13649581 | 13650686 |
| chr3R | 13651089 | 13651586 |
| chr3R | 13769709 | 13770422 |
| chr3R | 13889259 | 13889970 |
| chr3R | 13900003 | 13901238 |
| chr3R | 13903390 | 13904375 |
| chr3R | 13946894 | 13947909 |
| chr3R | 13949278 | 13949981 |
| chr3R | 13951406 | 13952008 |
| chr3R | 13967932 | 13968781 |
| chr3R | 14025027 | 14025676 |
| chr3R | 14055854 | 14056657 |
| chr3R | 14135987 | 14136806 |
| chr3R | 14196859 | 14197644 |
| chr3R | 14198245 | 14199175 |
| chr3R | 14206038 | 14207011 |
| chr3R | 14223161 | 14223885 |
| chr3R | 14224390 | 14225176 |
| chr3R | 14273809 | 14274549 |
| chr3R | 14306429 | 14307408 |
| chr3R | 14446992 | 14447634 |
| chr3R | 14484912 | 14485352 |
| chr3R | 14488668 | 14489853 |
| chr3R | 14564723 | 14566149 |
| chr3R | 14567013 | 14567541 |
| chr3R | 14568677 | 14569580 |
| chr3R | 14584337 | 14585069 |
| chr3R | 14613874 | 14614944 |
| chr3R | 14620810 | 14621449 |
| chr3R | 14740387 | 14740981 |
| chr3R | 14743878 | 14744459 |
| chr3R | 14749402 | 14749793 |
| chr3R | 14890106 | 14890692 |
| chr3R | 14893126 | 14893645 |

|       |          |          |
|-------|----------|----------|
| chr3R | 14919094 | 14919986 |
| chr3R | 14922242 | 14922999 |
| chr3R | 14947005 | 14947532 |
| chr3R | 14976918 | 14977542 |
| chr3R | 14987667 | 14988279 |
| chr3R | 14989511 | 14990570 |
| chr3R | 14991604 | 14992204 |
| chr3R | 15106886 | 15108385 |
| chr3R | 15111580 | 15112140 |
| chr3R | 15112248 | 15113412 |
| chr3R | 15145437 | 15146467 |
| chr3R | 15151097 | 15151862 |
| chr3R | 15221661 | 15222733 |
| chr3R | 15391579 | 15392131 |
| chr3R | 15395353 | 15396100 |
| chr3R | 15466829 | 15467337 |
| chr3R | 15489967 | 15490807 |
| chr3R | 15497128 | 15497684 |
| chr3R | 15686837 | 15687584 |
| chr3R | 15689787 | 15690560 |
| chr3R | 15728606 | 15729450 |
| chr3R | 15730351 | 15731018 |
| chr3R | 15827921 | 15828347 |
| chr3R | 15861529 | 15862063 |
| chr3R | 16082559 | 16083463 |
| chr3R | 16091291 | 16091896 |
| chr3R | 16116791 | 16117412 |
| chr3R | 16134953 | 16135759 |
| chr3R | 16400056 | 16401036 |
| chr3R | 16405768 | 16406792 |
| chr3R | 16418782 | 16419255 |
| chr3R | 16472040 | 16472822 |
| chr3R | 16561175 | 16561834 |
| chr3R | 16591281 | 16592114 |
| chr3R | 16609443 | 16611198 |
| chr3R | 16741717 | 16742115 |
| chr3R | 16774432 | 16774880 |
| chr3R | 16848658 | 16850001 |
| chr3R | 16885836 | 16886975 |
| chr3R | 16895687 | 16896183 |
| chr3R | 16922230 | 16923047 |
| chr3R | 16936877 | 16938039 |
| chr3R | 16952942 | 16953678 |
| chr3R | 16964015 | 16964648 |
| chr3R | 17014219 | 17014879 |
| chr3R | 17122363 | 17123365 |
| chr3R | 17204513 | 17205199 |
| chr3R | 17205469 | 17206164 |
| chr3R | 17237902 | 17238995 |
| chr3R | 17259484 | 17260605 |
| chr3R | 17263977 | 17265079 |
| chr3R | 17271631 | 17272789 |
| chr3R | 17278141 | 17278858 |

|       |          |          |
|-------|----------|----------|
| chr3R | 17281698 | 17282589 |
| chr3R | 17282700 | 17283709 |
| chr3R | 17285779 | 17286749 |
| chr3R | 17298833 | 17299460 |
| chr3R | 17299815 | 17300648 |
| chr3R | 17324237 | 17326261 |
| chr3R | 17441739 | 17442393 |
| chr3R | 17456033 | 17456439 |
| chr3R | 17473940 | 17474391 |
| chr3R | 17475477 | 17475939 |
| chr3R | 17476098 | 17476635 |
| chr3R | 17477162 | 17477654 |
| chr3R | 17650322 | 17650694 |
| chr3R | 17664205 | 17664620 |
| chr3R | 17681455 | 17682086 |
| chr3R | 17684975 | 17685909 |
| chr3R | 18002528 | 18003540 |
| chr3R | 18019809 | 18020475 |
| chr3R | 18023188 | 18023807 |
| chr3R | 18180522 | 18180968 |
| chr3R | 18187912 | 18188518 |
| chr3R | 18273691 | 18274374 |
| chr3R | 18353590 | 18354429 |
| chr3R | 18373127 | 18373680 |
| chr3R | 18413264 | 18413733 |
| chr3R | 18414856 | 18415439 |
| chr3R | 18492870 | 18493492 |
| chr3R | 18576281 | 18576832 |
| chr3R | 18952346 | 18952935 |
| chr3R | 18957097 | 18959219 |
| chr3R | 18960029 | 18960688 |
| chr3R | 18967336 | 18968272 |
| chr3R | 18969856 | 18970574 |
| chr3R | 18970961 | 18971988 |
| chr3R | 18973593 | 18974820 |
| chr3R | 19001182 | 19001607 |
| chr3R | 19017599 | 19019897 |
| chr3R | 19026385 | 19028165 |
| chr3R | 19039067 | 19039666 |
| chr3R | 19116931 | 19118454 |
| chr3R | 19118637 | 19122024 |
| chr3R | 19159309 | 19160203 |
| chr3R | 19312308 | 19313175 |
| chr3R | 19495342 | 19495763 |
| chr3R | 19529783 | 19530427 |
| chr3R | 19608138 | 19608852 |
| chr3R | 19694522 | 19695124 |
| chr3R | 19715816 | 19716490 |
| chr3R | 19765681 | 19766566 |
| chr3R | 19768476 | 19769105 |
| chr3R | 19818609 | 19819733 |
| chr3R | 19857252 | 19858047 |
| chr3R | 19873649 | 19874086 |

|       |          |          |
|-------|----------|----------|
| chr3R | 19881907 | 19882944 |
| chr3R | 19968521 | 19969992 |
| chr3R | 20056257 | 20057336 |
| chr3R | 20059358 | 20060456 |
| chr3R | 20368997 | 20369706 |
| chr3R | 20407657 | 20408595 |
| chr3R | 20411574 | 20413012 |
| chr3R | 20428505 | 20429756 |
| chr3R | 20455950 | 20456695 |
| chr3R | 20546012 | 20547174 |
| chr3R | 20593329 | 20594945 |
| chr3R | 20808734 | 20809528 |
| chr3R | 20875246 | 20876390 |
| chr3R | 20882209 | 20882776 |
| chr3R | 20905886 | 20907641 |
| chr3R | 20908235 | 20909604 |
| chr3R | 20914523 | 20915213 |
| chr3R | 20919896 | 20920474 |
| chr3R | 20920621 | 20921425 |
| chr3R | 20963095 | 20964174 |
| chr3R | 21008358 | 21008925 |
| chr3R | 21013200 | 21013689 |
| chr3R | 21014402 | 21015329 |
| chr3R | 21030967 | 21031779 |
| chr3R | 21084099 | 21084710 |
| chr3R | 21288194 | 21289068 |
| chr3R | 21298773 | 21299216 |
| chr3R | 21349909 | 21350997 |
| chr3R | 21381284 | 21382049 |
| chr3R | 21459234 | 21460289 |
| chr3R | 21463805 | 21464770 |
| chr3R | 21464922 | 21465490 |
| chr3R | 21465833 | 21466873 |
| chr3R | 21472552 | 21472991 |
| chr3R | 21473675 | 21474282 |
| chr3R | 21563415 | 21564522 |
| chr3R | 21565688 | 21566927 |
| chr3R | 21585719 | 21586072 |
| chr3R | 21587328 | 21588167 |
| chr3R | 21822062 | 21822604 |
| chr3R | 21828509 | 21829478 |
| chr3R | 21831496 | 21832505 |
| chr3R | 21833835 | 21834456 |
| chr3R | 21834569 | 21835050 |
| chr3R | 21835548 | 21836451 |
| chr3R | 21837741 | 21838530 |
| chr3R | 21843909 | 21844748 |
| chr3R | 21860511 | 21861210 |
| chr3R | 21867272 | 21868662 |
| chr3R | 21900410 | 21901101 |
| chr3R | 21906266 | 21906884 |
| chr3R | 21921611 | 21922933 |
| chr3R | 21923212 | 21923685 |

|       |          |          |
|-------|----------|----------|
| chr3R | 21923968 | 21924597 |
| chr3R | 21924881 | 21925975 |
| chr3R | 22086729 | 22087566 |
| chr3R | 22347546 | 22348587 |
| chr3R | 22360190 | 22361292 |
| chr3R | 22362252 | 22362889 |
| chr3R | 22688294 | 22689098 |
| chr3R | 22700855 | 22701938 |
| chr3R | 22707359 | 22708277 |
| chr3R | 22748401 | 22749047 |
| chr3R | 22749167 | 22749518 |
| chr3R | 22752522 | 22753442 |
| chr3R | 22758891 | 22759323 |
| chr3R | 22792651 | 22793220 |
| chr3R | 22954494 | 22955801 |
| chr3R | 22977497 | 22978694 |
| chr3R | 23011533 | 23012260 |
| chr3R | 23019102 | 23020718 |
| chr3R | 23022352 | 23023360 |
| chr3R | 23043596 | 23044346 |
| chr3R | 23051809 | 23052333 |
| chr3R | 23096221 | 23096700 |
| chr3R | 23099045 | 23099697 |
| chr3R | 23106541 | 23108336 |
| chr3R | 23384567 | 23385600 |
| chr3R | 23525982 | 23526551 |
| chr3R | 23748543 | 23749311 |
| chr3R | 24310624 | 24311792 |
| chr3R | 24361416 | 24362492 |
| chr3R | 24362757 | 24363377 |
| chr3R | 24372588 | 24373695 |
| chr3R | 24410667 | 24411905 |
| chr3R | 24425668 | 24426690 |
| chr3R | 24503495 | 24503975 |
| chr3R | 24507936 | 24508896 |
| chr3R | 24669463 | 24670573 |
| chr3R | 24671021 | 24671703 |
| chr3R | 24686843 | 24687978 |
| chr3R | 24889389 | 24890850 |
| chr3R | 24899691 | 24900275 |
| chr3R | 24913894 | 24914965 |
| chr3R | 24917688 | 24918529 |
| chr3R | 24921283 | 24921789 |
| chr3R | 24921848 | 24922981 |
| chr3R | 24948537 | 24949212 |
| chr3R | 24983432 | 24984122 |
| chr3R | 25025650 | 25026463 |
| chr3R | 25032361 | 25033044 |
| chr3R | 25035777 | 25036332 |
| chr3R | 25054770 | 25055702 |
| chr3R | 25080429 | 25082239 |
| chr3R | 25082494 | 25082994 |
| chr3R | 25083856 | 25084283 |



|       |          |          |
|-------|----------|----------|
| chr3R | 25102644 | 25103131 |
| chr3R | 25103599 | 25104081 |
| chr3R | 25107072 | 25107558 |
| chr3R | 25108142 | 25109859 |
| chr3R | 25109967 | 25111253 |
| chr3R | 25282726 | 25283379 |
| chr3R | 25286519 | 25287183 |
| chr3R | 25331881 | 25332512 |
| chr3R | 25333245 | 25334052 |
| chr3R | 25334919 | 25335693 |
| chr3R | 25338151 | 25339250 |
| chr3R | 25345524 | 25346831 |
| chr3R | 25348261 | 25348966 |
| chr3R | 25349236 | 25349829 |
| chr3R | 25351386 | 25351864 |
| chr3R | 25352022 | 25353748 |
| chr3R | 25360686 | 25361304 |
| chr3R | 25363925 | 25365010 |
| chr3R | 25371150 | 25371877 |
| chr3R | 25380179 | 25380664 |
| chr3R | 25381560 | 25382694 |
| chr3R | 25384122 | 25384883 |
| chr3R | 25392914 | 25393459 |
| chr3R | 25516278 | 25517681 |
| chr3R | 25548819 | 25549361 |
| chr3R | 25550937 | 25551867 |
| chr3R | 25591231 | 25591761 |
| chr3R | 25603592 | 25604415 |
| chr3R | 25628431 | 25629119 |
| chr3R | 25666026 | 25666872 |
| chr3R | 25667478 | 25667982 |
| chr3R | 25693848 | 25694535 |
| chr3R | 25702178 | 25702702 |
| chr3R | 25864128 | 25864992 |
| chr3R | 25870964 | 25872187 |
| chr3R | 25920151 | 25921476 |
| chr3R | 25922629 | 25923228 |
| chr3R | 25924690 | 25925128 |
| chr3R | 26017129 | 26017526 |
| chr3R | 26068564 | 26069650 |
| chr3R | 26074590 | 26075049 |
| chr3R | 26082553 | 26082993 |
| chr3R | 26083655 | 26084136 |
| chr3R | 26087593 | 26087961 |
| chr3R | 26101881 | 26102900 |
| chr3R | 26110089 | 26110840 |
| chr3R | 26160069 | 26160802 |
| chr3R | 26213500 | 26214323 |
| chr3R | 26285841 | 26287261 |
| chr3R | 26352747 | 26353651 |
| chr3R | 26396165 | 26396670 |
| chr3R | 26426607 | 26427590 |
| chr3R | 26589654 | 26590458 |

|       |          |          |
|-------|----------|----------|
| chr3R | 26592308 | 26593579 |
| chr3R | 26597973 | 26598610 |
| chr3R | 26606682 | 26608257 |
| chr3R | 26656233 | 26656921 |
| chr3R | 26737871 | 26738858 |
| chr3R | 26879608 | 26880057 |
| chr3R | 26885533 | 26886131 |
| chr3R | 26886791 | 26887234 |
| chr3R | 26887505 | 26888967 |
| chr3R | 26889258 | 26890257 |
| chr3R | 26893489 | 26894648 |
| chr3R | 26952766 | 26953486 |
| chr3R | 27046946 | 27048156 |
| chr3R | 27209093 | 27210176 |
| chr3R | 27210584 | 27211072 |
| chr3R | 27327053 | 27327725 |
| chr3R | 27436093 | 27436994 |
| chr3R | 27474652 | 27475143 |
| chr3R | 27494691 | 27495399 |
| chr3R | 27523568 | 27524298 |
| chr3R | 27540461 | 27541130 |
| chr3R | 27550333 | 27551592 |
| chr3R | 27573324 | 27574607 |
| chr3R | 27584379 | 27584927 |
| chr3R | 27638129 | 27638647 |
| chr3R | 27761851 | 27762443 |
| chr3R | 27762493 | 27764572 |
| chr3R | 27768860 | 27769815 |
| chr3R | 27771295 | 27772012 |
| chr3R | 27803282 | 27804453 |
| chr3R | 27810971 | 27811711 |
| chr3R | 27893514 | 27894394 |
| chrX  | 20130    | 20693    |
| chrX  | 158137   | 158651   |
| chrX  | 312970   | 313618   |
| chrX  | 338094   | 338969   |
| chrX  | 342402   | 343304   |
| chrX  | 390677   | 391311   |
| chrX  | 510444   | 511799   |
| chrX  | 522533   | 523572   |
| chrX  | 529625   | 531289   |
| chrX  | 580486   | 581317   |
| chrX  | 659736   | 660713   |
| chrX  | 668757   | 669390   |
| chrX  | 694998   | 695760   |
| chrX  | 1167200  | 1168141  |
| chrX  | 1180399  | 1181737  |
| chrX  | 1214208  | 1215419  |
| chrX  | 1242874  | 1243971  |
| chrX  | 1247493  | 1248299  |
| chrX  | 1292824  | 1293992  |
| chrX  | 1305254  | 1305682  |
| chrX  | 1455742  | 1456600  |

|      |         |         |
|------|---------|---------|
| chrX | 1460692 | 1461503 |
| chrX | 1468007 | 1469238 |
| chrX | 1510289 | 1511294 |
| chrX | 1714836 | 1715420 |
| chrX | 1724391 | 1725283 |
| chrX | 1735042 | 1735955 |
| chrX | 1801951 | 1802702 |
| chrX | 1841279 | 1842019 |
| chrX | 1845408 | 1846078 |
| chrX | 1865637 | 1866663 |
| chrX | 2016119 | 2017264 |
| chrX | 2018469 | 2020076 |
| chrX | 2028133 | 2030044 |
| chrX | 2030218 | 2034940 |
| chrX | 2114128 | 2115204 |
| chrX | 2156445 | 2157340 |
| chrX | 2187473 | 2188685 |
| chrX | 2197975 | 2198377 |
| chrX | 2202292 | 2202844 |
| chrX | 2253826 | 2254932 |
| chrX | 2346737 | 2347158 |
| chrX | 2349367 | 2350259 |
| chrX | 2439238 | 2440053 |
| chrX | 2536819 | 2537563 |
| chrX | 2541452 | 2542245 |
| chrX | 2684259 | 2687322 |
| chrX | 2689759 | 2691032 |
| chrX | 2918851 | 2919630 |
| chrX | 2935496 | 2936047 |
| chrX | 3030356 | 3031027 |
| chrX | 3055811 | 3056753 |
| chrX | 3241032 | 3241865 |
| chrX | 3275547 | 3276131 |
| chrX | 3301867 | 3302639 |
| chrX | 3302807 | 3303621 |
| chrX | 3305776 | 3306258 |
| chrX | 3328483 | 3329172 |
| chrX | 3346957 | 3347583 |
| chrX | 3376354 | 3377012 |
| chrX | 3612646 | 3613667 |
| chrX | 3614063 | 3615035 |
| chrX | 3634626 | 3635573 |
| chrX | 3635716 | 3638102 |
| chrX | 3670051 | 3670923 |
| chrX | 3673712 | 3674484 |
| chrX | 3728638 | 3729400 |
| chrX | 3816787 | 3817428 |
| chrX | 3842988 | 3843861 |
| chrX | 4001352 | 4001827 |
| chrX | 4274173 | 4275398 |
| chrX | 4280267 | 4281563 |
| chrX | 4285095 | 4287283 |
| chrX | 4305179 | 4305988 |

|      |         |         |
|------|---------|---------|
| chrX | 4306389 | 4307766 |
| chrX | 4317663 | 4318534 |
| chrX | 4318608 | 4320025 |
| chrX | 4320779 | 4321654 |
| chrX | 4328415 | 4329591 |
| chrX | 4333853 | 4334633 |
| chrX | 4334711 | 4335873 |
| chrX | 4342792 | 4343498 |
| chrX | 4343573 | 4344837 |
| chrX | 4364818 | 4365770 |
| chrX | 4483689 | 4484568 |
| chrX | 4490014 | 4490637 |
| chrX | 4490885 | 4491993 |
| chrX | 4501829 | 4502234 |
| chrX | 4506964 | 4507839 |
| chrX | 4510354 | 4511442 |
| chrX | 4560836 | 4561316 |
| chrX | 4804255 | 4804905 |
| chrX | 4937948 | 4938715 |
| chrX | 5314047 | 5314648 |
| chrX | 5454083 | 5455365 |
| chrX | 5487878 | 5488485 |
| chrX | 5501193 | 5503235 |
| chrX | 5589995 | 5591583 |
| chrX | 5639736 | 5640514 |
| chrX | 5640737 | 5641242 |
| chrX | 5677505 | 5678417 |
| chrX | 5780976 | 5781679 |
| chrX | 5784839 | 5786321 |
| chrX | 5788142 | 5788766 |
| chrX | 5789615 | 5790354 |
| chrX | 5792506 | 5793839 |
| chrX | 5793979 | 5794708 |
| chrX | 5795204 | 5795828 |
| chrX | 5809344 | 5810201 |
| chrX | 5891824 | 5892691 |
| chrX | 5894217 | 5896515 |
| chrX | 5896872 | 5897791 |
| chrX | 5903264 | 5903756 |
| chrX | 5908397 | 5909091 |
| chrX | 5909132 | 5910300 |
| chrX | 5931435 | 5932561 |
| chrX | 6148663 | 6149497 |
| chrX | 6161073 | 6162794 |
| chrX | 6536999 | 6537789 |
| chrX | 6671008 | 6671848 |
| chrX | 6672041 | 6673385 |
| chrX | 6750239 | 6750755 |
| chrX | 6762138 | 6763247 |
| chrX | 6874615 | 6875612 |
| chrX | 6876764 | 6877704 |
| chrX | 6878886 | 6879468 |
| chrX | 6880468 | 6881270 |

|      |         |         |
|------|---------|---------|
| chrX | 6881452 | 6882201 |
| chrX | 6884458 | 6885215 |
| chrX | 6891008 | 6891790 |
| chrX | 6892524 | 6894615 |
| chrX | 6894733 | 6895715 |
| chrX | 6902003 | 6903127 |
| chrX | 6990754 | 6992196 |
| chrX | 7098617 | 7099573 |
| chrX | 7124290 | 7124838 |
| chrX | 7187407 | 7188138 |
| chrX | 7194278 | 7195007 |
| chrX | 7195459 | 7197116 |
| chrX | 7199484 | 7200179 |
| chrX | 7200413 | 7201186 |
| chrX | 7201513 | 7202172 |
| chrX | 7229296 | 7229795 |
| chrX | 7231109 | 7232358 |
| chrX | 7420737 | 7421513 |
| chrX | 7437909 | 7438732 |
| chrX | 7498357 | 7499138 |
| chrX | 7501126 | 7501722 |
| chrX | 7507363 | 7507887 |
| chrX | 7520970 | 7521949 |
| chrX | 7522104 | 7522705 |
| chrX | 7524087 | 7524674 |
| chrX | 7806057 | 7806733 |
| chrX | 7863459 | 7864451 |
| chrX | 7951339 | 7951938 |
| chrX | 8089434 | 8090377 |
| chrX | 8109929 | 8110772 |
| chrX | 8123696 | 8124415 |
| chrX | 8188036 | 8189122 |
| chrX | 8302593 | 8303285 |
| chrX | 8315426 | 8316164 |
| chrX | 8331689 | 8332456 |
| chrX | 8385571 | 8386041 |
| chrX | 8454615 | 8455949 |
| chrX | 8518171 | 8519238 |
| chrX | 8544416 | 8545684 |
| chrX | 8554289 | 8554869 |
| chrX | 8555065 | 8555650 |
| chrX | 8570342 | 8571049 |
| chrX | 8575264 | 8576072 |
| chrX | 8652080 | 8652829 |
| chrX | 8698780 | 8699916 |
| chrX | 8700358 | 8701170 |
| chrX | 8701430 | 8702015 |
| chrX | 8785215 | 8785947 |
| chrX | 8789469 | 8790505 |
| chrX | 8923941 | 8924754 |
| chrX | 9002602 | 9003239 |
| chrX | 9003349 | 9004546 |
| chrX | 9178100 | 9178958 |

|      |          |          |
|------|----------|----------|
| chrX | 9199382  | 9200073  |
| chrX | 9200284  | 9200880  |
| chrX | 9478098  | 9479182  |
| chrX | 9479367  | 9480220  |
| chrX | 9489630  | 9490161  |
| chrX | 9493204  | 9493907  |
| chrX | 9494215  | 9494990  |
| chrX | 9544692  | 9545412  |
| chrX | 9578015  | 9581564  |
| chrX | 9622832  | 9623328  |
| chrX | 9665055  | 9666141  |
| chrX | 9667960  | 9668711  |
| chrX | 9823914  | 9824528  |
| chrX | 10009567 | 10010177 |
| chrX | 10012908 | 10013678 |
| chrX | 10219063 | 10219766 |
| chrX | 10440696 | 10441394 |
| chrX | 10441611 | 10442385 |
| chrX | 10635686 | 10636653 |
| chrX | 10657326 | 10658050 |
| chrX | 10695431 | 10696527 |
| chrX | 11018576 | 11019416 |
| chrX | 11263447 | 11264432 |
| chrX | 11346820 | 11347613 |
| chrX | 11388751 | 11389355 |
| chrX | 11588884 | 11589549 |
| chrX | 11607630 | 11608270 |
| chrX | 11609598 | 11611399 |
| chrX | 11670273 | 11671182 |
| chrX | 11685926 | 11686740 |
| chrX | 11748536 | 11749579 |
| chrX | 11807438 | 11808085 |
| chrX | 11897736 | 11898485 |
| chrX | 12469389 | 12470427 |
| chrX | 12473571 | 12474434 |
| chrX | 12525694 | 12526291 |
| chrX | 12548254 | 12549264 |
| chrX | 12552856 | 12553645 |
| chrX | 12645257 | 12645812 |
| chrX | 12645973 | 12646584 |
| chrX | 12647789 | 12648295 |
| chrX | 12649216 | 12649921 |
| chrX | 12759935 | 12761013 |
| chrX | 13053385 | 13054045 |
| chrX | 13134486 | 13135051 |
| chrX | 13151000 | 13152111 |
| chrX | 13226286 | 13227282 |
| chrX | 13288916 | 13289620 |
| chrX | 13290831 | 13291449 |
| chrX | 13298025 | 13298399 |
| chrX | 13305176 | 13305937 |
| chrX | 13457883 | 13458606 |
| chrX | 13615973 | 13616642 |

|      |          |          |
|------|----------|----------|
| chrX | 13629673 | 13630330 |
| chrX | 13676123 | 13676622 |
| chrX | 13783970 | 13784892 |
| chrX | 13842125 | 13842902 |
| chrX | 13888563 | 13889426 |
| chrX | 13889792 | 13890514 |
| chrX | 13931537 | 13932391 |
| chrX | 14027938 | 14028722 |
| chrX | 14375372 | 14376187 |
| chrX | 14603829 | 14605086 |
| chrX | 14625227 | 14625832 |
| chrX | 14644548 | 14645088 |
| chrX | 14791349 | 14791880 |
| chrX | 14816951 | 14817841 |
| chrX | 14937613 | 14938396 |
| chrX | 14969578 | 14970460 |
| chrX | 15375849 | 15376635 |
| chrX | 15627690 | 15628548 |
| chrX | 15701384 | 15701943 |
| chrX | 15827021 | 15827809 |
| chrX | 15899157 | 15899857 |
| chrX | 15990258 | 15990954 |
| chrX | 16031659 | 16032424 |
| chrX | 16036909 | 16037686 |
| chrX | 16041305 | 16042758 |
| chrX | 16042806 | 16043607 |
| chrX | 16044423 | 16045227 |
| chrX | 16046029 | 16046814 |
| chrX | 16051044 | 16051785 |
| chrX | 16052561 | 16053598 |
| chrX | 16107904 | 16112474 |
| chrX | 16213558 | 16214071 |
| chrX | 16226826 | 16227435 |
| chrX | 16227554 | 16228619 |
| chrX | 16267099 | 16268012 |
| chrX | 16278645 | 16279325 |
| chrX | 16492444 | 16493921 |
| chrX | 16534311 | 16535353 |
| chrX | 16541890 | 16542552 |
| chrX | 16644944 | 16646043 |
| chrX | 16655559 | 16656675 |
| chrX | 16659556 | 16660582 |
| chrX | 16712489 | 16713158 |
| chrX | 16806953 | 16807675 |
| chrX | 16822677 | 16823577 |
| chrX | 17053780 | 17054369 |
| chrX | 17190579 | 17191372 |
| chrX | 17192766 | 17194505 |
| chrX | 17207018 | 17207608 |
| chrX | 17208134 | 17209086 |
| chrX | 17232455 | 17233428 |
| chrX | 17239270 | 17240194 |
| chrX | 17245296 | 17246004 |

|      |          |          |
|------|----------|----------|
| chrX | 17291072 | 17291832 |
| chrX | 17291925 | 17292749 |
| chrX | 17404189 | 17405242 |
| chrX | 17412051 | 17412708 |
| chrX | 17445297 | 17446016 |
| chrX | 17454824 | 17455548 |
| chrX | 17455897 | 17456772 |
| chrX | 17473220 | 17473971 |
| chrX | 17551406 | 17552046 |
| chrX | 17576599 | 17577022 |
| chrX | 17577371 | 17577992 |
| chrX | 17661820 | 17662982 |
| chrX | 17683006 | 17685008 |
| chrX | 17695061 | 17695591 |
| chrX | 17695974 | 17698745 |
| chrX | 17722422 | 17722998 |
| chrX | 17723653 | 17724745 |
| chrX | 17750520 | 17751495 |
| chrX | 17780406 | 17781281 |
| chrX | 18150895 | 18151744 |
| chrX | 18158778 | 18159556 |
| chrX | 18161042 | 18161960 |
| chrX | 18193316 | 18193868 |
| chrX | 18203036 | 18203980 |
| chrX | 18204712 | 18206045 |
| chrX | 18206247 | 18207838 |
| chrX | 18398640 | 18399540 |
| chrX | 18432686 | 18434159 |
| chrX | 18528053 | 18528867 |
| chrX | 18579550 | 18580151 |
| chrX | 18670192 | 18670782 |
| chrX | 18824730 | 18825424 |
| chrX | 18868546 | 18869331 |
| chrX | 19192027 | 19192734 |
| chrX | 19208551 | 19209362 |
| chrX | 19248625 | 19249265 |
| chrX | 19254689 | 19255209 |
| chrX | 19439828 | 19442132 |
| chrX | 19491594 | 19492350 |
| chrX | 19501379 | 19502128 |
| chrX | 19525406 | 19526332 |
| chrX | 19530915 | 19533142 |
| chrX | 19590825 | 19591498 |
| chrX | 19676937 | 19677844 |
| chrX | 19780721 | 19781721 |
| chrX | 20067618 | 20068132 |
| chrX | 20106964 | 20107569 |
| chrX | 20108698 | 20109331 |
| chrX | 20111729 | 20112580 |
| chrX | 20372105 | 20372992 |
| chrX | 20906028 | 20906805 |
| chrX | 20923983 | 20925505 |
| chrX | 20939844 | 20940642 |



|      |          |          |
|------|----------|----------|
| chrX | 20942817 | 20943740 |
| chrX | 21152237 | 21152887 |
| chrX | 21245037 | 21245842 |
| chrX | 21502432 | 21502917 |
| chrX | 22035677 | 22036292 |
