# Supplementary material
Source: PubMed Central journal article supplement (PMC3589086)
Supplement: embor20131s2.pdf [file embor20131s2.pdf]

## Supplemental Table 2: Genes associated with Brk ChIP peaks

A2bp1  
A3-3  
ab  
abd-A  
Abd-B  
AcCoAS  
Acon  
Act5C  
Adf1  
Adk3  
Ady43A  
Aef1  
ago  
AGO1  
akirin  
al  
alc  
Ald  
Alh  
alien  
ALiX  
alpha-Adaptin  
alpha-Man-I  
alt  
Amph  
Amun  
Ance-3  
Ank2  
AnnIX  
AnnX  
Antp  
aop  
ap  
AP-1gamma  
AP-2  
AP-47  
Apc  
aPKC  
app  
APP-BP1  
Aps  
ara  
arr  
Art1  
Art4  
aru  
ASPP  
Asx  
Atg13  
Atg2  
atl

ato  
Atox1  
ATP7  
Atpalpha  
ATPsyn-d  
aur  
Awh  
axo  
B4  
B52  
bab2  
baf  
Bap60  
baz  
bbg  
BBS8  
beat-Ib  
ben  
Best2  
beta-Spec  
betaTub56D  
B-H1  
B-H2  
bi  
bib  
bin3  
bip1  
bl  
Blimp-1  
blot  
blow  
blue  
bocksbeutel  
boi  
bon  
bou  
bowl  
br  
brat  
brk  
bs  
bsf  
Bsg  
Btk29A  
btn  
btsz  
btz  
bun  
bves  
Bx  
c11.1  
C15  
cact

cad  
Cad74A  
Cad87A  
Cad96Ca  
Cad99C  
CalpA  
calypso  
cana  
CAP  
Cap-H2  
caps  
capt  
capu  
caup  
CBP  
cbt  
Cct5  
CDase  
cdc2c  
Cdc42  
cdi  
ced-6  
cenG1A  
cg  
CG10006  
CG10026  
CG10082  
CG10176  
CG1021  
CG10211  
CG10237  
CG10253  
CG10283  
CG10286  
CG10332  
CG10338  
CG10347  
CG10348  
CG10383  
CG10428  
CG10463  
CG10492  
CG10512  
CG10527  
CG10543  
CG10585  
CG10625  
CG10628  
CG10688  
CG10741  
CG10802  
CG10804  
CG10889

CG10903  
CG10914  
CG10915  
CG10924  
CG10962  
CG10992  
CG11033  
CG1104  
CG11041  
CG1105  
CG11103  
CG11122  
CG11138  
CG11163  
CG11170  
CG11200  
CG11226  
CG11247  
CG11275  
CG11284  
CG11299  
CG11347  
CG11417  
CG11418  
CG1142  
CG11438  
CG11447  
CG1146  
CG11486  
CG11505  
CG11526  
CG11619  
CG11665  
CG11727  
CG11779  
CG11784  
CG11791  
CG11857  
CG11870  
CG11873  
CG11880  
CG11897  
CG11899  
CG11984  
CG11985  
CG11986  
CG12004  
CG12006  
CG12029  
CG12054  
CG12093  
CG12096  
CG12112

CG12125  
CG12130  
CG1218  
CG12207  
CG12214  
CG12262  
CG12338  
CG12379  
CG12384  
CG12424  
CG12535  
CG12582  
CG12688  
CG12698  
CG12765  
CG12772  
CG12773  
CG12811  
CG12814  
CG12868  
CG12948  
CG12991  
CG13050  
CG13064  
CG13183  
CG13204  
CG13220  
CG13252  
CG13344  
CG13349  
CG13366  
CG13377  
CG1344  
CG13506  
CG13531  
CG13565  
CG1360  
CG13604  
CG13624  
CG13625  
CG13630  
CG13631  
CG13654  
CG13690  
CG13800  
CG13807  
CG13891  
CG13894  
CG13917  
CG13921  
CG13996  
CG14104  
CG14132

CG14213  
CG1427  
CG14299  
CG14304  
CG14372  
CG1440  
CG14425  
CG14478  
CG14505  
CG14657  
CG14688  
CG14757  
CG14810  
CG14834  
CG14855  
CG14860  
CG14869  
CG14905  
CG14966  
CG14984  
CG14997  
CG15083  
CG15098  
CG15099  
CG15107  
CG15111  
CG15118  
CG15160  
CG1518  
CG15269  
CG15358  
CG15435  
CG15544  
CG15609  
CG15817  
CG15822  
CG15863  
CG1599  
CG1600  
CG1607  
CG1667  
CG16718  
CG1673  
CG1677  
CG16778  
CG16799  
CG1681  
CG16817  
CG1688  
CG16935  
CG16974  
CG17002  
CG17104

CG17180  
CG17230  
CG17233  
CG17278  
CG17327  
CG17544  
CG17672  
CG17698  
CG17734  
CG17737  
CG17738  
CG17746  
CG17834  
CG17838  
CG17883  
CG17977  
CG1814  
CG1815  
CG18173  
CG18193  
CG18317  
CG18431  
CG18507  
CG18516  
CG18661  
CG18731  
CG18764  
CG1888  
CG1910  
CG1927  
CG1943  
CG1965  
CG1998  
CG2003  
CG2051  
CG2082  
CG2083  
CG2091  
CG2187  
CG2199  
CG2211  
CG2224  
CG2246  
CG2608  
CG2641  
CG2747  
CG2818  
CG2852  
CG2865  
CG2909  
CG2911  
CG2943  
CG2970

CG30015  
CG30069  
CG30089  
CG3009  
CG3011  
CG30194  
CG30279  
CG3036  
CG30372  
CG30389  
CG30421  
CG30438  
CG30440  
CG30463  
CG30492  
CG3061  
CG3071  
CG31021  
CG31038  
CG31048  
CG31111  
CG31145  
CG31158  
CG31191  
CG31224  
CG3125  
CG31274  
CG31301  
CG31365  
CG31368  
CG31414  
CG31457  
CG3149  
CG31522  
CG31606  
CG31626  
CG31635  
CG3165  
CG31678  
CG31694  
CG31709  
CG31710  
CG31743  
CG31751  
CG31782  
CG31808  
CG31848  
CG31955  
CG32082  
CG32103  
CG32111  
CG32252  
CG32262



CG32263  
CG32264  
CG32276  
CG32318  
CG32354  
CG32365  
CG32373  
CG32444  
CG32479  
CG32521  
CG32529  
CG32532  
CG32541  
CG32556  
CG32557  
CG3262  
CG32666  
CG32676  
CG32711  
CG32772  
CG32795  
CG3281  
CG32812  
CG32816  
CG32982  
CG33054  
CG33056  
CG33129  
CG33144  
CG33155  
CG33158  
CG33169  
CG33170  
CG33181  
CG33229  
CG33232  
CG33298  
CG33453  
CG33463  
CG33467  
CG33523  
CG33691  
CG33692  
CG33695  
CG3376  
CG33774  
CG33792  
CG33936  
CG33960  
CG34006  
CG34008  
CG34044  
CG3408

CG34104  
CG34110  
CG34116  
CG34126  
CG34127  
CG34133  
CG34242  
CG34288  
CG34299  
CG34304  
CG34313  
CG34340  
CG34349  
CG34360  
CG34371  
CG34376  
CG34380  
CG34383  
CG34398  
CG34439  
CG34441  
CG3505  
CG3523  
CG3529  
CG3563  
CG3600  
CG3608  
CG3624  
CG3678  
CG3788  
CG3825  
CG3835  
CG3838  
CG3902  
CG3919  
CG3925  
CG3961  
CG4036  
CG4078  
CG4159  
CG4165  
CG4221  
CG42238  
CG42245  
CG42268  
CG42269  
CG42272  
CG42306  
CG42327  
CG42353  
CG42354  
CG42358  
CG42359

CG42379  
CG42380  
CG42381  
CG42388  
CG42389  
CG4239  
CG42445  
CG42457  
CG42490  
CG42506  
CG42507  
CG42542  
CG42574  
CG42575  
CG42615  
CG42637  
CG42657  
CG42666  
CG42668  
CG42669  
CG42673  
CG42674  
CG42699  
CG42724  
CG42741  
CG42747  
CG42748  
CG42754  
CG42762  
CG42763  
CG4278  
CG42794  
CG42806  
CG42837  
CG42848  
CG4294  
CG4338  
CG4496  
CG4497  
CG4502  
CG4538  
CG4572  
CG4580  
CG4622  
CG4674  
CG4686  
CG4699  
CG4726  
CG4741  
CG4753  
CG4766  
CG4769  
CG4797

CG4829  
CG4844  
CG4887  
CG4928  
CG4935  
CG4980  
CG5001  
CG5060  
CG5065  
CG5087  
CG5118  
CG5142  
CG5146  
CG5214  
CG5224  
CG5261  
CG5302  
CG5315  
CG5346  
CG5398  
CG5439  
CG5491  
CG5500  
CG5521  
CG5541  
CG5630  
CG5642  
CG5694  
CG5708  
CG5789  
CG5793  
CG5802  
CG5835  
CG5873  
CG5888  
CG5903  
CG5916  
CG5933  
CG5934  
CG5938  
CG5941  
CG5953  
CG5973  
CG6043  
CG6049  
CG6051  
CG6094  
CG6118  
CG6154  
CG6163  
CG6206  
CG6241  
CG6272

CG6287  
CG6340  
CG6398  
CG6405  
CG6424  
CG6465  
CG6490  
CG6565  
CG6608  
CG6638  
CG6685  
CG6707  
CG6746  
CG6751  
CG6752  
CG6762  
CG6767  
CG6783  
CG6788  
CG6808  
CG6813  
CG6833  
CG6854  
CG6860  
CG6891  
CG6904  
CG6923  
CG6951  
CG6954  
CG6959  
CG6966  
CG7023  
CG7029  
CG7071  
CG7077  
CG7082  
CG7154  
CG7220  
CG7231  
CG7265  
CG7272  
CG7337  
CG7367  
CG7369  
CG7386  
CG7394  
CG7432  
CG7518  
CG7593  
CG7675  
CG7720  
CG7757  
CG7777

CG7789  
CG7816  
CG7834  
CG7878  
CG7879  
CG7943  
CG7966  
CG7985  
CG7991  
CG7995  
CG8021  
CG8026  
CG8031  
CG8034  
CG8036  
CG8043  
CG8116  
CG8149  
CG8170  
CG8177  
CG8180  
CG8193  
CG8211  
CG8223  
CG8249  
CG8281  
CG8306  
CG8312  
CG8319  
CG8323  
CG8446  
CG8451  
CG8468  
CG8478  
CG8481  
CG8486  
CG8492  
CG8498  
CG8547  
CG8552  
CG8635  
CG8642  
CG8709  
CG8740  
CG8788  
CG8801  
CG8814  
CG8889  
CG8892  
CG8920  
CG9027  
CG9062  
CG9134

CG9139  
CG9149  
CG9238  
CG9243  
CG9305  
CG9328  
CG9331  
CG9338  
CG9399  
CG9406  
CG9427  
CG9436  
CG9503  
CG9514  
CG9601  
CG9628  
CG9634  
CG9641  
CG9650  
CG9737  
CG9747  
CG9773  
CG9784  
CG9796  
CG9799  
CG9801  
CG9821  
CG9865  
CG9894  
CG9896  
CG9921  
CG9922  
CG9932  
CG9941  
CG9973  
CG9990  
CG9992  
Chd64  
cher  
chic  
chinmo  
chm  
chn  
Chro  
Cht7  
cib  
Cirl  
Cka  
ckd  
CkIalpha  
CkIIbeta  
Cks85A  
Clc

CLIP-190  
cmet  
cnc  
cno  
comm  
comt  
conv  
cora  
corto  
Cp1  
Cp190  
cpo  
Cpr  
Cpr62Ba  
Cpsf160  
Cpsf73  
CrebA  
croc  
crol  
crp  
Csk  
CSN8  
CstF-64  
ct  
CtBP  
cu  
Cul-3  
Cul-5  
cv-2  
CycB  
CycE  
CycG  
Cyp1  
Cyp28d2  
Cyp6a22  
Cyp6d5  
Cyt-c-d  
Cyt-c-p  
d  
D  
D19A  
D19B  
DAAM  
dac  
Dad  
dally  
dan  
danr  
dbe  
dco  
Dcr-2  
debcl  
Def



Dek  
Der-1  
desat1  
Df31  
Dfd  
Dhc98D  
Dip2  
DIP2  
disco  
disco-r  
DI  
dlg1  
DII  
dlp  
DLP  
dm  
dmrt99B  
DnaJ-1  
dnr1  
dnt  
Doc1  
Doc2  
Doc3  
dp  
Dp  
Dpit47  
dpn  
dpp  
DppIII  
dpr2  
Dr  
Dredd  
drm  
drpr  
ds  
Dscam  
Dsp1  
dsx  
Duox  
dve  
dy  
dys  
Dys  
E23  
E2f  
E5  
ebi  
E(bx)  
ec  
EcR  
ed  
Edem1  
Edem2

Edg78E  
Ef1alpha48D  
Ef2b  
eff  
eg  
Egfr  
eIF3-S9  
eIF-4a  
eIF-4E  
Eip63E  
Eip74EF  
Eip75B  
Eip78C  
eIB  
Elongin-B  
Elp1  
emc  
ems  
en  
EndoGI  
Ent1  
ERp60  
esg  
esn  
Esy2  
Ets21C  
ex  
exba  
exex  
Exn  
e(y)3  
eya  
eyg  
Fas1  
fax  
fbp  
fd68A  
fd96Ca  
fd96Cb  
Fdxh  
Fem-1  
Fen1  
Fer1HCH  
Fer2LCH  
ferrochelatase  
Fhos  
Fili  
Fim  
Fkbp13  
fkh  
flfl  
Flo-2  
fng

fok  
for  
foxo  
Fps85D  
fra  
frj  
fru  
Fs  
fs(1)h  
Fsn  
ft  
ftz-f1  
Fur1  
Fur2  
fus  
fw  
fwd  
fz  
fz2  
fz3  
fzr2  
g  
Gadd45  
galectin  
gammaSnap  
Gap1  
gcm  
gcm2  
Gdh  
Gdi  
Gef26  
gem  
Gga  
Gint3  
gish  
gk  
gl  
glec  
GluRIIE  
Glycogenin  
GNBP3  
Gos28  
Got2  
gpp  
Gr97a  
granny-smith  
grh  
grn  
gro  
growl  
grp  
gry  
gsb

gsb-n  
Gsc  
GstD1  
GstS1  
GV1  
Gyc76C  
H15  
H2.0  
ham  
hdc  
Hel89B  
heph  
Herp  
Hex-A  
HGTX  
hh  
hipk  
His4r  
hiw  
HLHmbeta  
HLHmdelta  
HmgD  
HmgZ  
Hnf4  
hoip  
Hph  
HPS4  
Hr39  
Hr46  
Hrb87F  
Hrb98DE  
Hs2st  
Hs6st  
Hsc70Cb  
Hsp22  
Hsp23  
Hsp26  
Hsp67Ba  
Hsp67Bb  
Hsp67Bc  
Hsp68  
HspB8  
hth  
hts  
Hus1-like  
Ide  
Idgf4  
if  
IM18  
Imp  
ImpE2  
ImpE3  
ImpL2

Ino80  
Inos  
InR  
inv  
Invadolysin  
inx2  
inx7  
IP3K1  
Ir  
Ir94h  
Ire1  
itp  
Itp-r83A  
jagn  
janA  
janB  
jdp  
jigr1  
jim  
jing  
jumu  
kal-1  
Kap-alpha1  
katanin-60  
kay  
KCNQ  
kek5  
ken  
kermit  
kibra  
kirre  
kis  
kkv  
klar  
Klp64D  
Klp98A  
klu  
kn  
kni  
knrl  
ko  
koko  
KP78a  
KP78b  
Kr-h1  
KrT95D  
kst  
Kul  
kuz  
I(1)1Bi  
I(1)G0136  
I(1)G0144  
I(1)G0222

I(1)G0232  
I(2)05510  
I(2)k01209  
I(2)k16918  
I(3)02640  
I(3)03670  
I(3)07882  
I(3)82Fd  
I(3)L1231  
I(3)mbt  
I(3)neo38  
La  
lab  
laf  
LanA  
Lap1  
Lar  
lbe  
lbi  
lea  
Lerp  
lig  
Lim1  
Lis-1  
Lk6  
lmg  
Lmpt  
lola  
lolal  
LpR1  
LpR2  
Lrt  
Lsd-2  
luna  
lz  
m2  
mab-21  
Madm  
magu  
malpha  
mam  
mamo  
Map205  
Mapmodulin  
mask  
mbc  
MBD-like  
Mcm5  
Mcr  
Mdh  
Mdr49  
Med  
MED6

MED7  
Mef2  
Meics  
mei-W68  
Mekk1  
MEP-1  
MESK4  
MESR3  
mew  
mey  
mfas  
Mi-2  
mid  
mip130  
miple2  
mirr  
Mkk4  
Mkp3  
mld  
Mms19  
mnb  
Mob2  
modSP  
Moe  
mop  
mor  
mrj  
mRpL2  
mRpL21  
mRpL27  
mRpL53  
mRpS16  
mRpS23  
mrt  
ms(3)K81  
msb1l  
msi  
Msp-300  
Msr-110  
Mst36Fa  
Mst85C  
MTA1-like  
mtacp1  
MTF-1  
mth  
mth1  
mth14  
mth15  
mts  
mTTF  
Mur2B  
mus101  
mus308

muskelin  
muted  
Mvl  
Myd88  
Myo31DF  
Myo61F  
N  
Naam  
nab  
nAcRalpha-7E  
nAcRalpha-80B  
nahoda  
Nc  
NC2alpha  
Ncc69  
neb  
nej  
nero  
NetB  
Neu3  
neur  
NK7.1  
nkd  
Nmdar1  
Nmdmc  
nmo  
Nnf1a  
Noa36  
noc  
nord  
Not1  
Notum  
Npc2a  
Nrt  
nrv2  
Nrx-IV  
ns2  
Ntf-2  
nub  
nudE  
nuf  
Nup153  
Nup44A  
Nup50  
Nup98  
Oatp74D  
Oaz  
obst-A  
obst-B  
oc  
ocn  
Oda  
odd



OdsH  
ogre  
olf413  
omd  
ome  
opa  
Optix  
orb2  
os  
osa  
Osi2  
otk  
otp  
out  
oxt  
P58IPK  
pAbp  
Paip2  
par-1  
Past1  
pb  
pbl  
Pcd  
Pcf11  
pcs  
Pde11  
pdm2  
pdm3  
Pdp1  
pds5  
peb  
pelo  
Pep  
Pepck  
pex13  
Pez  
Pfk  
Pgm  
ph-d  
PHGPx  
PhKgamma  
phm  
ph-p  
phr6-4  
Pi3K21B  
pic  
pigs  
Pino  
Pk61C  
pkaap  
Pka-C1  
Pka-R2  
PKD

Pkn  
Pld  
Pli  
pnr  
pnt  
pnut  
PNUTS  
polo  
POSH  
pot  
Poxm  
Poxn  
Pp2A-29B  
ppa  
PpD3  
ppk  
Ppn  
PQBP-1  
pr  
prd  
PRL-1  
prod  
pros  
Prosap  
pr-set7  
prtp  
ps  
Psc  
Psf1  
psq  
PSR  
ptc  
Ptp61F  
Ptp99A  
Ptpmeg  
Ptr  
Ptx1  
pum  
put  
px  
pxb  
Pxt  
pyd  
pyx  
qm  
r2d2  
Rab11  
Rab23  
Rab7  
Rab8  
Rac1  
Rac2  
Rack1

Rala  
Ranbp16  
RanBPM  
RanGap  
Rapgap1  
Ravus  
Rb97D  
Rbcn-3A  
Rbcn-3B  
Rbf  
Rcd2  
rdx  
rept  
retm  
retn  
rgn  
Rh4  
rho  
RhoBTB  
RhoGAP100F  
RhoGAP92B  
RhoGAP93B  
RhoGEF2  
RhoL  
rib  
rn  
ro  
robo  
Roc2  
rols  
rost  
Rox8  
Rpb8  
RpI135  
rpk  
RpL13A  
RpL22  
RpL23  
RpL26  
RpL27A  
RpL28  
RpL32  
RpL36  
RpL37A  
RpL4  
RpL5  
RpLP1  
Rpn5  
Rpp30  
rpr  
RpS10b  
RpS13  
RpS16

RpS17  
Rpt3  
rt  
rtGEF  
Rtnl1  
rumi  
rux  
Rx  
S  
S6k  
Sac1  
salm  
salr  
sals  
Samuel  
sas  
sbb  
sca  
scaf  
scb  
schlank  
Scr  
scrib  
scyl  
sd  
sda  
SdhC  
sdk  
sdt  
sea  
sec23  
Sec61alpha  
sec8  
SelD  
Sema-1a  
Sema-1b  
Sema-5c  
sens-2  
Ser  
serp  
SF1  
Sfmbt  
sgg  
sgl  
Sh3beta  
shep  
shf  
shn  
Shroom  
sick  
sim  
sima  
simj

Sin3A  
skd  
SKIP  
slgA  
sli  
slmb  
slow  
slp1  
slp2  
sm  
smg  
SmG  
sn  
snama  
Snap24  
SNF4Agamma  
snky  
Snoo  
snz  
so  
sob  
sowah  
Sox100B  
Sox14  
Sox15  
Sox21b  
SoxN  
Sp1  
SP1173  
Spargel  
Spase22-23  
Spc25  
Spec2  
spen  
spi  
spin  
Spn  
Spn43Aa  
Spn5  
SPoCk  
spri  
spt4  
Spt6  
Spx  
sqz  
sr  
Src42A  
srp  
Srp14  
Srp19  
Sry-beta  
ss  
Ssdp

Ssl1  
ssp2  
ssp3  
ssp4  
SsRbeta  
stan  
stc  
stg  
sti  
stwl  
Surf4  
Surf6  
su(s)  
Su(Tpl)  
Su(var)3-7  
Su(z)2  
svp  
sw  
Sxl  
Sym  
Syn  
T48  
tacc  
Taf7  
Tango1  
Tango13  
Tango14  
Tango5  
Tango7  
tara  
TBPH  
Tctp  
Ten-m  
TepIII  
TepIV  
TER94  
tey  
TfIIS  
th  
thr  
tin  
tinc  
tio  
Tis11  
tkv  
tlk  
Tm1  
tmod  
tna  
toc  
toe  
tok  
Toll-7

tomosyn  
Top2  
Topors  
tou  
TppII  
Tpr2  
tra2  
Traf4  
tral  
Treh  
Trf2  
Trf4-1  
trh  
Trim9  
trio  
Trl  
trn  
trol  
trx  
Trx-2  
Try29F  
Tsf2  
tsh  
Tsp42Ed  
Tsp42Ee  
Tsp74F  
tsr  
ttk  
tud  
tun  
tup  
tutl  
twe  
twi  
twS  
UbcD4  
Ubp64E  
Ubx  
Ufd1-like  
Ugt58Fa  
uif  
unc-4  
unc-5  
unpg  
ush  
vap  
Vap-33-1  
vari  
vas  
verm  
vfl  
vg  
Vha100-2

Vha16  
vimar  
Vinc  
vir-1  
vn  
Vps33B  
vri  
Vsx1  
Vsx2  
vvl  
w  
W  
wac  
wdp  
wech  
wg  
wgn  
wit  
Wnt10  
Wnt2  
Wnt5  
wor  
Wsck  
xmas-2  
Xrp1  
yemalpha  
yu  
Zasp52  
zf30C  
zfh1
